# Supplementary material for: Randomised clinical trial of an emergency department-based peer recovery support intervention to increase treatment uptake and reduce recurrent overdose among individuals at high risk for opioid overdose: study protocol for the navigator trial
Source: PubMed Central journal article supplement — BMJ Open. 2019 Nov 11;9(11):e032052. doi: 10.1136/bmjopen-2019-032052 (PMC6858243; doi:10.1136/bmjopen-2019-032052), 2019-11-11
Supplement: bmjopen-2019-032052.draft_revisions.pdf [file bmjopen-2019-032052.draft_revisions.pdf]

# BMJ Open

BMJ Open is committed to open peer review. As part of this commitment we make the peer review history of every article we publish publicly available.

When an article is published we post the peer reviewers' comments and the authors' responses online. We also post the versions of the paper that were used during peer review. These are the versions that the peer review comments apply to.

The versions of the paper that follow are the versions that were submitted during the peer review process. They are not the versions of record or the final published versions. They should not be cited or distributed as the published version of this manuscript.

BMJ Open is an open access journal and the full, final, typeset and author-corrected version of record of the manuscript is available on our site with no access controls, subscription charges or pay-per-view fees (<http://bmjopen.bmj.com>).

If you have any questions on BMJ Open's open peer review process please email [info.bmjopen@bmj.com](mailto:info.bmjopen@bmj.com)

# BMJ Open

## A Randomized Clinical Trial of an Emergency Department-Based Peer Recovery Support Intervention to Increase Treatment Uptake and Reduce Recurrent Overdose among Individuals at High Risk for Opioid Overdose: Study Protocol

|                               |                                                                                                                                                                                                                                                                                                                                                                                                                                                                                                                                                                                                                                                                                                                                                                                                                                                                                                                                                                                                                                                                                                                                                                                                                                                                                                                                                                                                                           |
|-------------------------------|---------------------------------------------------------------------------------------------------------------------------------------------------------------------------------------------------------------------------------------------------------------------------------------------------------------------------------------------------------------------------------------------------------------------------------------------------------------------------------------------------------------------------------------------------------------------------------------------------------------------------------------------------------------------------------------------------------------------------------------------------------------------------------------------------------------------------------------------------------------------------------------------------------------------------------------------------------------------------------------------------------------------------------------------------------------------------------------------------------------------------------------------------------------------------------------------------------------------------------------------------------------------------------------------------------------------------------------------------------------------------------------------------------------------------|
| Journal:                      | <i>BMJ Open</i>                                                                                                                                                                                                                                                                                                                                                                                                                                                                                                                                                                                                                                                                                                                                                                                                                                                                                                                                                                                                                                                                                                                                                                                                                                                                                                                                                                                                           |
| Manuscript ID                 | bmjopen-2019-032052                                                                                                                                                                                                                                                                                                                                                                                                                                                                                                                                                                                                                                                                                                                                                                                                                                                                                                                                                                                                                                                                                                                                                                                                                                                                                                                                                                                                       |
| Article Type:                 | Protocol                                                                                                                                                                                                                                                                                                                                                                                                                                                                                                                                                                                                                                                                                                                                                                                                                                                                                                                                                                                                                                                                                                                                                                                                                                                                                                                                                                                                                  |
| Date Submitted by the Author: | 26-Jun-2019                                                                                                                                                                                                                                                                                                                                                                                                                                                                                                                                                                                                                                                                                                                                                                                                                                                                                                                                                                                                                                                                                                                                                                                                                                                                                                                                                                                                               |
| Complete List of Authors:     | Goedel, William; Brown University School of Public Health, Department of Epidemiology<br>Marshall, Brandon; Brown University, Department of Epidemiology<br>Samuels, Elizabeth; Brown University Warren Alpert Medical School, Department of Emergency Medicine<br>Brinkman, Mark; Rhode Island Hospital, Department of Emergency Medicine<br>Dettor, Debra; Anchor Recovery Community Center<br>Langdon, Kirsten; Brown University Warren Alpert Medical School, Department of Psychiatry and Human Behavior<br>Mahoney, Linda; Rhode Island Department of Behavioral Healthcare Developmental Disabilities and Hospitals<br>Merchant, Roland; Brown University School of Public Health, Department of Epidemiology; Brown University Warren Alpert Medical School, Department of Emergency Medicine<br>Nizami, Tarek; Rhode Island Hospital, Department of Emergency Medicine<br>O'Toole, George; Anchor Recovery Community Center<br>Ramsey, Susan; Brown University Warren Alpert Medical School, Department of Psychiatry and Human Behavior; Brown University Warren Alpert Medical School, Department of Medicine<br>Yedinak, Jesse; Brown University School of Public Health, Department of Epidemiology<br>Beaudoin, Francesca L; Brown University Warren Alpert Medical School, Department of Emergency Medicine; Brown University School of Public Health, Department of Health Services, Policy, and Practice |
| Keywords:                     | ACCIDENT & EMERGENCY MEDICINE, PUBLIC HEALTH, Substance misuse < PSYCHIATRY                                                                                                                                                                                                                                                                                                                                                                                                                                                                                                                                                                                                                                                                                                                                                                                                                                                                                                                                                                                                                                                                                                                                                                                                                                                                                                                                               |
|                               |                                                                                                                                                                                                                                                                                                                                                                                                                                                                                                                                                                                                                                                                                                                                                                                                                                                                                                                                                                                                                                                                                                                                                                                                                                                                                                                                                                                                                           |

SCHOLARONE™  
Manuscripts

1  
2  
3 **A Randomized Clinical Trial of an Emergency Department-Based Peer Recovery Support**  
4 **Intervention to Increase Treatment Uptake and Reduce Recurrent Overdose among Individuals at**  
5 **High Risk for Opioid Overdose: Study Protocol**  
6  
7

8  
9 William C. Goedel, BA<sup>1</sup>

10  
11 Brandon D.L. Marshall, PhD<sup>1</sup>

12  
13 Elizabeth A. Samuels, MD, MPH<sup>2</sup>

14  
15 Mark G. Brinkman, BS<sup>3</sup>

16  
17 Debra Dettor, MS, CPRS<sup>4</sup>

18  
19 Kirsten J. Langdon, PhD<sup>5</sup>

20  
21 Linda Mahoney, CAADC, CCS<sup>6</sup>

22  
23 Roland C. Merchant, MD, ScD, MPH<sup>1,2</sup>

24  
25 Tarek Nizami, MD<sup>3</sup>

26  
27 George A. O'Toole, BS, CPRS<sup>4</sup>

28  
29 Susan E. Ramsey, PhD<sup>5,7</sup>

30  
31 Jesse L. Yedinak, MPA<sup>1</sup>

32  
33 Francesca L. Beaudoin, MD, PhD<sup>2,8</sup>

34  
35 1. Department of Epidemiology, School of Public Health, Brown University, Providence, RI

36  
37 2. Department of Emergency Medicine, Warren Alpert Medical School, Brown University, Providence, RI

38  
39 3. Department of Emergency Medicine, Rhode Island Hospital, Providence, RI

40  
41 4. Anchor Recovery Community Center, Pawtucket, RI

42  
43 5. Department of Psychiatry and Human Behavior, Warren Alpert Medical School, Brown University, Providence, RI

44  
45 6. Rhode Island Department of Behavioral Healthcare, Developmental Disabilities, and Health, Cranston, RI

46  
47 7. Department of Medicine, Warren Alpert Medical School, Brown University, Providence, RI

48  
49 8. Department of Health Services, Policy, and Practice, School of Public Health, Brown University, Providence, RI

50  
51 **Address Correspondence to:**

52  
53 Francesca L. Beaudoin, MD, PhD; Brown University Alpert Medical School Department of Emergency  
54  
55 Medicine; 55 Claverick Street, 2nd Floor, Providence, Rhode Island, United States, 02903. E-mail Address:  
56  
57 francesca\_beaudoin@brown.edu. Phone Number: (401) 444-5411. Fax Number: (401) 444-4307.  
58  
59

## ABSTRACT

**Introduction:** Effective approaches to increase engagement in treatment for opioid use disorder (OUD) and reduce the risk of recurrent overdose and death following emergency department (ED) presentation for opioid overdose remain unknown. As such, we aim to compare the effectiveness of behavioral interventions delivered in the ED by certified peer recovery support specialists relative to those delivered by licensed clinical social workers (LCSWs) in promoting OUD treatment uptake and reducing recurrent ED visits for opioid overdose.

**Methods and Analysis:** Adult ED patients who are at high risk for opioid overdose (i.e., are being treated for an opioid overdose or identified by the treating physician as having OUD) ( $n = 650$ ) will be recruited from two emergency departments in a single health care system in Providence, Rhode Island into a two-arm randomized trial with 18 months of follow-up post-randomization. Eligible participants will be randomly assigned (1:1) in the ED to receive a behavioral intervention from a certified peer recovery support specialist or a behavioral intervention from an LCSW. The primary outcomes are engagement in formal OUD treatment within 30 days of the initial ED visit and recurrent ED visits for opioid overdose within 18 months of the initial ED visit, as measured through statewide administrative records.

**Ethics and Dissemination:** Given the strong interest in peer-based recovery interventions for opioid overdose survivors, the results of this trial have the potential to change clinical practice for treating patients at high risk for opioid overdose who present to EDs.

**Trial Registration:** NCT03684681 (ClinicalTrials.gov)

## KEYWORDS

Opioid Overdose; Emergency Department; Peer Support; Recovery; Randomized Trial

### STRENGTHS AND LIMITATIONS

- This study represents the first randomized controlled trial to assess the impact of a peer recovery support intervention on uptake of OUD treatment and recurrent ED presentation for opioid-involved overdose.
- This study leverages a statewide comprehensive data sharing infrastructure to use administrative records to characterize the primary outcomes (e.g., OUD treatment enrollment, recurrent ED presentation), thus overcoming biases associated with self-reported outcomes and loss to follow-up in previous studies.
- Although the administrative databases used to characterize the primary outcomes are meant to be representative, they are by no means comprehensive (i.e., individuals who enroll in OUD treatment programs or who present to EDs in other states will not be captured in these resources).

## INTRODUCTION

Deaths attributable to accidental drug overdose, particularly those involving opioids, have reached epidemic levels in the United States (US) (1-4). In the past two decades, US overdose mortality rates have more than doubled, from 6.2 per 100,000 persons in 2000 to 21.7 per 100,000 persons in 2017 (2, 3). There have been 700,000 opioid overdose deaths between 2000 to 2015 in the US (5), and the crisis that is expected to worsen under current trends (6). Since 2013, the opioid overdose epidemic has been marked by significant increases in deaths involving powerful synthetic opioids (e.g., fentanyl) (3). The burden of the drug overdose epidemic is greatly elevated in New England, where fentanyl has been present in the illicit drug supply since as early as 2012 (7-10). Rhode Island has one of the highest drug overdose rates in the nation (3), and in 2014 reported the third and fourth highest rate of opioid-related emergency department (ED) visits and inpatient hospital stays, respectively (11).

In addition to increases in fatal opioid overdoses, EDs have had substantial increases in visits for non-fatal opioid overdoses (12-14). About 120,000 ED visits were reported for suspected non-fatal opioid overdoses between July 2016 and September 2017 in sixteen states participating in the Enhanced State Opioid Overdose Surveillance, representing a 35% increase over this period (15). As such, the ED serves as a critical intervention site for providing services to people at high risk of opioid overdose and those with opioid use disorder (OUD). In the year after presenting to the ED for a drug overdose, a person is at heightened risk for death (16, 17). In a nested case-control study in New York, the odds of death due to prescription drug overdose were 4.9 times higher for those with two ED visits, 16.6 times higher for those with three ED visits, and 48.2 times higher for those with four or more visits relative to one ED visit or less in the year preceding death (16). Thus, the ED is both a critical and timely place for intervention and the reason for the ED visit itself (i.e., overdose) can be used as an opportunity to identify patients at highest risk of fatal drug overdose and deliver interventions (18).

The most effective means to promote engagement in substance use disorder (SUD) treatment and reduce the risk of recurrent overdose and death following presentation to an ED for opioid overdose remains unknown. One of the only randomized studies of overdose education combined with a brief behavioral intervention for high-risk adults recruited from an ED setting did not result in reduced recurrent overdose, subsequent ED visits, or hospitalizations compared to usual care (19). It is possible, however, that these types of interventions may be more effective if delivered by people with lived experiences with SUD and recovery. Peer-based interventions are an effective component of care across non-clinical settings and in other aspects of health care for other conditions (20), but little is known about their effectiveness in improving outcomes for persons at high risk for opioid overdose. In response to Rhode Island's overdose

1  
2  
3 crisis, individuals in long-term recovery with specialized training in SUD management, known as certified  
4 peer recovery support specialists, have been deployed in EDs since 2014 (21). The goal of their work is to  
5 help patients navigate obstacles to recovery through problem-solving, goal setting, avoiding relapse  
6 triggers, and planning and obtaining services. Despite the promise of and significant national interest in this  
7 approach (22), no studies have rigorously evaluated whether peer-based behavioral interventions delivered  
8 in the ED result in improved outcomes for patients at high risk of opioid overdose.  
9  
10  
11  
12  
13

14 We aim to test the effectiveness of behavioral interventions delivered in the ED by certified peer recovery  
15 support specialists relative to those delivered by licensed clinical social workers (LCSWs). We hypothesize  
16 that, because certified peer recovery support specialists are able to draw from their own lived experiences  
17 with SUD and recovery, patients who are randomly assigned to receive a behavioral intervention from a  
18 peer recovery support specialist, as compared to receiving an intervention from an LCSW, will be: (1) more  
19 likely to engage in formal SUD treatment within 30 days following the initial visit, and (2) less likely to  
20 experience a recurrent ED visit for an opioid overdose during the succeeding 18 months.  
21  
22  
23  
24  
25  
26

## 27 **METHODS**

### 28 **Trial Design**

29  
30 The trial utilizes a parallel design where patients at high risk for opioid overdose who present to the ED are  
31 randomly assigned 1:1 to receive a behavioral intervention from a certified peer recovery support specialist  
32 or an LCSW. All protocols have been approved by the institutional review boards at the Lifespan health  
33 system representing the two clinical sites (Approval Number: 212418). The privacy of all trial participants  
34 is protected by a Certificate of Confidentiality issued by the National Institutes of Health.  
35  
36  
37  
38  
39

### 40 **Participants**

41 Rhode Island is home to over one million residents. Since 2000, the state has experienced a high burden of  
42 opioid overdose. According to the 2016–2017 cycle of the National Survey on Drug Use and Health, 4.7%  
43 of Rhode Islanders used heroin or misused a prescription opioid in the past year (23). Between 2013 and  
44 2017, the age-adjusted rate of death due to opioid overdose increased by 44.2%, from 18.1 to 26.1 per  
45 100,000 persons, with these increases largely driven by synthetic opioids other than methadone (16.8% of  
46 opioid overdose deaths in 2013 versus 72.6% in 2017) (24).  
47  
48  
49  
50  
51

52 Participants will be recruited from two EDs—Level 1 and Level 2 trauma centers—located in the state's  
53 capital of Providence. Together, these two EDs receive over 175,000 adult visits each year. Between 2017  
54  
55  
56  
57  
58  
59

1  
2  
3 and 2018, the two EDs reported a total of 1,446 visits for suspected opioid overdoses, representing 45% of  
4 all ED visits for suspected opioid overdose reported to the Rhode Island Department of Health ( $n = 3,239$ ).  
5  
6

7  
8 A consecutive sample of ED patients will be assessed for eligibility by one of eleven full-time research  
9 assistants employed in the two EDs who can recruit participants 24 hours per day, seven days per week.  
10 Potential participants will be identified by the research assistants by screening electronic medical records  
11 (EMRs) or by referral from treating providers in the ED. Potential participants will be considered eligible  
12 if they are 18 years of age or older and speak English. To be eligible, participants must also be in the ED  
13 because they are: (1) being treated for an opioid overdose; (2) receiving treatment related to OUD (e.g.,  
14 infectious complication, withdrawal); or (3) self-report an opioid overdose within the previous 12 months.  
15 The presence of an opioid overdose will be determined by the treating physician and is generally defined  
16 as (1) the presence of decreased levels of consciousness or respiratory depression and (2) occurring after  
17 the consumption of opioids or resolving after the administration of naloxone. Potential participants will be  
18 deemed ineligible if they are critically ill or injured, have previously enrolled in the trial, are in police  
19 custody or incarcerated, pregnant, or live outside of Rhode Island. Patients who are critically ill or injured  
20 will be eligible for screening and enrollment once cleared to participate by their treating physician.  
21  
22  
23  
24  
25  
26  
27  
28  
29

### 30 **Patient and Public Involvement**

31 No patient involved.  
32  
33

### 34 **Interventions**

#### 35 Current Standard of Care

36 The current standard of care following an ED visit for an opioid overdose at the study sites is to receive a  
37 behavioral intervention delivered by a certified peer recovery support specialist or an LCSW. Whether a  
38 patient is evaluated by a social worker or a peer recovery support specialist can depend on the time of day,  
39 staff availability, and preferences or views of the provider or patient. In the trial, patients will be randomly  
40 assigned to receive a behavioral intervention in the ED delivered by (1) a staff LCSW, or (2) a certified  
41 peer recovery support specialist trained by the Anchor Recovery Community Center (Figure 1).  
42  
43  
44  
45  
46  
47  
48

#### 49 Behavioral Intervention Delivered by Certified Peer Recovery Support Specialists

50 The Anchor Recovery Community Center is Rhode Island's first community-based peer recovery center  
51 (21). It is designed as an access point for those with SUD, providing services such as job counseling, health  
52 and wellness activities, and individualized long-term peer recovery coaching (21). Through one of its  
53 outreach programs, known as AnchorED, the Anchor Recovery Community Center has deployed certified  
54  
55  
56  
57  
58  
59  
60



1  
2  
3 peer recovery support specialists to EDs across Rhode Island since 2014 (21). As part of AnchorED,  
4 certified peer recovery support specialists arrive in the ED within 30 minutes of consultation, assess  
5 individuals for readiness to seek treatment, provide linkage to treatment, and educate patients on overdose  
6 prevention and response (21). Peer recovery specialists call every day for ten days in an attempt to make  
7 contact following discharge from the ED. Once contact is made, peer recovery specialists and their clients  
8 make plans for regular contact and follow-up.  
9  
10  
11  
12

13  
14 To become a certified peer recovery support specialist, applicants must be in recovery for at least two years,  
15 undergo a 45-hour training program at Anchor Recovery Community Center based on the Connecticut  
16 Community for Addiction Recovery curriculum, and accrue 500 hours of supervised work experience  
17 providing peer recovery support services (21). All peer recovery support specialists obtain certification  
18 from the International Certification and Reciprocity Consortium (21). The certification program focuses on  
19 advocacy, wellness and recovery, motivational interviewing techniques, mentoring and education, and  
20 ethics as well as additional training on the provision of trauma-informed care and the transtheoretical model  
21 of behavior change. In addition to employing motivational interviewing techniques, peer recovery support  
22 specialists support individuals' self-efficacy and prevent relapse by addressing social, environmental, and  
23 personal factors, such as awareness and avoidance of relapse triggers, polysubstance use, stigma associated  
24 with SUD and their treatment, knowledge of treatment services (including the use of medications for OUD  
25 treatment), and addressing financial and transportation barriers to treatment (21). Certified peer recovery  
26 support specialists are uniquely positioned to deliver behavioral interventions to individuals who have  
27 experienced overdose as they couple their training with lived experiences of SUD and recovery (21).  
28  
29  
30  
31  
32  
33  
34  
35  
36  
37

### 38 Behavioral Intervention Delivered via Licensed Clinical Social Workers

39 There are 35 full and part-time LCSW on staff in the Department of Social Work between the two study  
40 sites. Staff social workers arrive in the ED within 30 minutes of consultation. Staff social workers are  
41 trained and available to deliver interventions to patients presenting with an opioid overdose and/or with  
42 OUD in the ED. As LCSWs, these individuals are capable of delivering a variety of interviewing and  
43 intervention techniques that are rooted in social work theory and practice models. Social work practice  
44 models are strategies that the social worker can incorporate into their interventions to help people meet their  
45 goals (e.g., task-centered practice, cognitive behavioral therapy, crisis intervention model). Although the  
46 intervention delivered by LCSWs and their associated theoretical underpinnings are similar in some  
47 respects to those associated with those delivered by certified peer recovery support specialists, the social  
48 worker intervention is intended to be a single session with referral to SUD treatment.  
49  
50  
51  
52  
53  
54  
55  
56  
57  
58  
59  
60

## Participant Assessments

While the primary outcomes assessments will rely on the use of administrative data (see below), we will also collect patient-reported assessments at baseline and follow-up. Baseline assessments will be administered by a research assistant in the ED to collect information about sociodemographic characteristics, medical history, medication use, substance use patterns, prior substance use treatment engagement, recovery capital (25), treatment readiness (26), opinions about medications for OUD treatment (27), perceived stigma towards people who use drugs (28), symptoms of pain (29), opioid withdrawal (30), and depression (31) using established instruments. Follow-up assessments will be conducted at 30 days, three months, and six months post-discharge, respectively. All data collection instruments will be designed using Research Electronic Data Capture (REDCap) software and administered using a tablet computer connected to the wireless network at the two study sites. All follow-up assessments will be conducted via telephone by a research assistant, and all responses will be directly entered into REDCap.

## Outcomes

### Primary Outcomes

The two primary outcomes of the trial are (1) engagement with a formal SUD treatment program within 30 days of the initial ED visit, and (2) recurrent ED visit(s) for a suspected opioid overdose over 18 months. Both endpoints will be assessed via statewide administrative databases as outlined below. All records will be linked deterministically to participant data using identifiable information in a secure, Health Insurance Portability and Accountability Act (HIPAA)-compliant computing environment.

The first primary outcome of the trial is treatment engagement, defined as admission to a formal, publicly licensed SUD treatment program within 30 days of the initial ED visit. The Rhode Island Department of Behavioral Health, Developmental Disabilities, and Hospitals (BHDDH) maintains the Behavioral Health Online Database (BHOLD), a state database containing information on all admission and discharge events of clients of all licensed behavioral healthcare organizations in the state (32). BHOLD is a comprehensive database on all licensed treatment programs, including inpatient detoxification programs, day treatment programs, residential treatment programs, intensive outpatient programs, and opioid treatment programs (32). In addition to this resource, records from the prescription drug monitoring program (PDMP) maintained by the Rhode Island Department of Health will be used to supplement BHOLD to identify patients who initiate buprenorphine in office-based settings (33).

The second primary outcome of the trial is recurrent visits to the ED for a suspected opioid overdose, defined as receipt of treatment in an ED in Rhode Island for an opioid overdose within the 18 months

1  
2  
3 following the initial ED visit at the two sites. The Rhode Island Quality Institute maintains CurrentCare, a  
4 health information exchange that provides a unified data system for EMRs for all major health systems in  
5 Rhode Island, allowing us to identify repeat visits for suspected opioid overdoses at all twelve EDs in the  
6 state (34). Opioid overdoses will be defined according to the Centers for Disease Control and Prevention  
7 (CDC) guidelines for all opioid poisonings and utilize International Classification of Disease (ICD) codes  
8 (35, 36). The Rhode Island Department of Health mandates that all suspected overdoses presenting to a  
9 hospital be reported to the department within 48 hours. This data source, referred to as the 48-hour overdose  
10 surveillance system (37), will be used to supplement the EMRs in CurrentCare.  
11  
12  
13  
14  
15

### 16 17 **Sample Size**

18 Based on preliminary assessments from the study sites, we are assuming that 7% of participants assigned  
19 to receive a behavioral intervention from an LCSW will enroll in a formal SUD treatment program within  
20 30 days of their ED visit. Given this assumption for a sample size of 650 participants, we have at least 80%  
21 power to detect a two-fold increase in treatment engagement among participants assigned to receive a  
22 behavioral intervention from a peer recovery specialist. This two-fold increase was identified by community  
23 stakeholders as an appropriate benchmark for this outcome. Based on a recent medical record review from  
24 one of the study sites and estimates from other studies (19, 38), we are assuming that 15% of participants  
25 who receive a behavioral intervention from an LCSW will experience a subsequent repeat ED visit for  
26 opioid overdose. Given this assumption and our sample, we have at least 80% power to detect a 50% relative  
27 reduction in the risk of recurrent ED visits for opioid overdose within 18 months following the initial visit  
28 among those assigned to receive a behavioral intervention from a peer recovery specialist.  
29  
30  
31  
32  
33  
34  
35  
36  
37

### 38 **Randomization**

39 Participants will be randomly assigned 1:1 to receive either a behavioral intervention delivered by a certified  
40 peer recovery support specialist or by an LCSW. Participants will be stratified during randomization based  
41 on age and gender (39). Allocations will be randomly assigned using the REDCap randomization feature  
42 based on a random permutation method with block sizes between 4 and 8 (39). The randomization schedule  
43 will be maintained by a data manager not involved with participant recruitment or the final study analyses.  
44  
45  
46  
47  
48

### 49 **Blinding**

50 Participants and providers cannot be blinded to their intervention assignment. However, research assistants  
51 who are responsible for the follow-up assessments and investigators and analysts performing the study  
52 analyses will be blinded to arm allocation.  
53  
54  
55  
56  
57  
58  
59  
60

## Statistical Methods

We will use an intention-to-treat (ITT) approach in all analyses to estimate the average treatment effect. A sensitivity analysis will be conducted using a per-protocol approach with a sample restricted to those who complete their interventions. We will first assess the success of randomization by comparing key pre-intervention characteristics (e.g., sociodemographic characteristics, substance use patterns, prior engagement in formal SUD treatment) across the two arms using one-way analyses of variance (ANOVA) for continuous variables and  $\chi^2$  tests of independence of categorical variables. Should any differences in pre-intervention characteristics be detected between the two arms, we will include these variables as covariates in the primary outcomes analyses. Given our use of administrative data sources to characterize the primary outcomes, we anticipate minimal missingness in our final dataset, but missing covariate data will be handled using two-stage chained equations.

For the two primary outcomes (engagement in formal SUD treatment within 30 days of the initial ED visit and occurrence of a subsequent ED visit for opioid overdose within 18 months of the initial ED visit), we will first compare the proportions of patients with each of these outcomes in the two arms using  $\chi^2$  tests of independence. Second, we will fit separate logistic regression models for each of the outcomes to identify the independent effect of the intervention on the outcome, adjusting for pre-intervention characteristics.

## DISCUSSION

The AnchorED program of Anchor Recovery Community Center, which deploys certified peer recovery support specialists to EDs across Rhode Island to deliver behavioral interventions to individuals who have experienced an opioid overdose, is the first statewide program of its kind in the nation (21). Despite a lack of evidence to demonstrate the effectiveness of this program and improved long-term outcomes for patients, several other jurisdictions in the US have created or are initiating programs based on the AnchorED model (22). Given the intense interest in peer recovery models, the results of this trial have a strong potential to fundamentally change clinical practice paradigms for treating patients at high risk for opioid overdose who present to EDs across the nation.

The current study benefits from support from a unique policy environment in Rhode Island. In 2015, Governor Gina Raimondo signed an executive order to establish the Rhode Island Overdose Prevention and Intervention Task Force, which charged experts to develop a strategic plan to guide efforts to tackle the state's overdose crisis (40). An important outcome of this plan was a comprehensive data sharing infrastructure between key state agencies (including the Rhode Island Departments of Health and Behavioral Healthcare, Developmental Disabilities, and Hospitals) and academic researchers (41). These

1  
2  
3 data sharing agreements offer unprecedented access to population-based data on overdose morbidity and  
4 mortality (41). As a result, the trial investigators can create a large database linking participant data with  
5 multiple administrative databases to ascertain our primary and secondary outcomes. The ability to conduct  
6 these robust data linkages is an important methodological innovation that overcomes biases associated with  
7 self-reported outcomes and loss to follow-up in previous studies.  
8  
9  
10

11  
12 The results of this trial will need to be considered in light of some caveats. Although Good Samaritan laws  
13 are present in many jurisdictions across the US, including Rhode Island, to protect individuals from criminal  
14 prosecutions (42), many people do not call emergency medical services in the event of an overdose (43). It  
15 is possible that the intervention may increase participants' self-efficacy and willingness to engage with  
16 emergency medical services in the event of an overdose. As a result, those receiving the peer recovery  
17 intervention might be more likely to present to the ED in the event of an overdose. Should the intervention  
18 reduce the overall rate of non-fatal overdose but increase the proportion of non-fatal overdoses that are  
19 treated in the ED, the findings related to the impact of the intervention on recurrent ED visits may be null  
20 or counterintuitive. Although the administrative databases used to characterize the primary outcomes are  
21 meant to be representative, they are by no means comprehensive. Individuals who enroll in SUD treatment  
22 programs or who present to EDs in other states will not be captured in these resources. To address these  
23 limitations, we will conduct follow-up surveys to capture treatment enrollment and experiences of opioid  
24 overdose via phone interviews.  
25  
26  
27  
28  
29  
30  
31  
32  
33

34  
35 This trial represents the first systematic evaluation of behavioral interventions delivered by certified peer  
36 recovery support specialists in the ED to individuals at high risk for opioid overdose. Should the trial be  
37 successful, its findings have the potential to establish the evidence base for peer recovery support services  
38 as an effective intervention and provide support for the large-scale implementation of these services in EDs.  
39 Amidst a national crisis, peer recovery support interventions could be an effective means for improving  
40 SUD treatment engagement and reducing rates of fatal and non-fatal overdose.  
41  
42  
43  
44  
45  
46  
47  
48  
49  
50  
51  
52  
53  
54  
55  
56  
57  
58  
59  
60

## References

1. Rudd RA, Seth P, David F, Scholl L. Increases in drug and opioid-involved overdose deaths - United States, 2010–2015. *MMWR Morb Mortal Wkly Rep.* 2016;65(50–51):1445–52.
2. Rudd RA, Aleshire N, Zibbell JE, Gladden RM. Increases in drug and opioid overdose deaths - United States, 2000–2014. *MMWR Morb Mortal Wkly Rep.* 2016;64(50–51):1378–82.
3. Scholl L, Seth P, Kariisa M, Wilson N, Baldwin G. Drug and opioid-involved overdose deaths - United States, 2013–2017. *MMWR Morb Mortal Wkly Rep.* 2018;67(5152):1419–27.
4. Seth P, Scholl L, Rudd RA, Bacon S. Overdose deaths involving opioids, cocaine, and psychostimulants - United States, 2015–2016. *MMWR Morb Mortal Wkly Rep.* 2018;67(12):349–58.
5. Chen Q, Larochelle MR, Weaver DT, Lietz AP, Mueller PP, Mercaldo S, et al. Prevention of prescription opioid misuse and project overdose deaths in the United States. *JAMA Netw Open.* 2019;2(2):e187621.
6. Kiang MV, Basu S, Chen J, Alexander MJ. Assessment of changes in the geographical distribution of opioid-related mortality across the United States by opioid type, 1999–2016. *JAMA Netw Open.* 2019;2(2):e190040.
7. Springer YP, Gladden RM, O'Donnell J, Seth P. Fentanyl drug submissions – United States, 2010–2017. *MMWR Morb Mortal Wkly Rep.* 2019;68(2):41–2.
8. Mercado-Crespo MC, Sumner SA, Spelke MB, Sugerman DE, Stanley C. Increase in fentanyl-related overdose deaths - Rhode Island, November 2013–March 2014. *MMWR Morb Mortal Wkly Rep.* 2014;63(24):531.
9. Somerville NJ, O'Donnell J, Gladden RM, Zibbell JE, Green TC, Younkin M, et al. Characteristics of fentanyl overdose - Massachusetts, 2014–2016. *MMWR Morb Mortal Wkly Rep.* 2017;66(14):383–6.
10. Tommassoni AJ, Hawk KF, Jubanyik K, Noguee DP, Durant T, Lynch KL, et al. Multiple fentanyl overdoses - New Haven, Connecticut, June 23, 2016. *MMWR Morb Mortal Wkly Rep.* 2017;66(4):107–11.
11. Weiss AJ, Elixhauser A, Barrett ML, Steiner CA, Bailey MK, O'Malley L. Opioid-related inpatient stays and emergency department visits by state, 2009–2014. Rockville, Maryland: Agency for Healthcare Research and Quality; 2016.
12. Hasegawa K, Espinola JA, Brown DFM, Camargo CA. Trends in U.S. emergency department visits for opioid overdose, 1993–2010. *Pain Med.* 2014;15(10):1765–70.



13. Mazer-Amirshahi M, Sun C, Mullins P, Perrone J, Nelson L, Pines JM. Trends in emergency department resource utilization for poisoning-related visits, 2003–2011. *J Med Toxicol.* 2016;12(3):248-54.
14. Yokell MA, Delgado MK, Zaller ND, Wang NE, McGowan SK, Green TC. Presentation of prescription and nonprescription opioid overdoses to US emergency departments. *JAMA Intern Med.* 2014;174(12):2034–47.
15. Vivolo-Kantor AM, Seth P, Gladden RM, Mattison CL, Baldwin GT, Kite-Powell A, et al. Trends in emergency department visits for suspected opioid overdoses - United States, July 2016 to September 2017. *MMWR Morb Mortal Wkly Rep.* 2018;67(9):279–85.
16. Brady JE, DiMaggio CJ, Keyes KM, Doyle JJ, Richardson LD, Li G. Emergency department utilization and subsequent prescription drug overdose death. *Ann Epidemiol.* 2015;25(8):613-9.
17. Pavarin RM, Berardi D, Gambini D. Emergency department presentation and mortality due to overdose: A retrospective cohort study on nonfatal overdoses. *Subst Abus.* 2016;37(4):558-63.
18. Daly ER, Dufault K, Swenson DJ, Lakevicius P, Metcalf E, Chan BP. Use of emergency department data to monitor and respond to an increase in opioid overdose in New Hampshire, 2011-2015. *Public Health Rep.* 2017;132(S1):S73-S9.
19. Banta-Green CJ, Coffin PO, Merrill JO, Sears JM, Dunn C, Floyd AS, et al. Impacts of an opioid overdose prevention intervention delivered subsequent to acute care. *Inj Prev.* 2018; Available online ahead of print.
20. Ramchand R, Ahluwalia SC, Xenakis L, Apaydin E, Raaen L, Grimm G. A systematic review of peer-supported interventions for health promotion and disease prevention. *Prev Med.* 2017;101:156-70.
21. Waye KM, Goyer J, Dettor D, Mahoney L, Samuels EA, Yedinak JL, et al. Implementing peer recovery services for overdose prevention in Rhode Island: An examination of two outreach-based approaches. *Addict Behav.* 2019;89:85-91.
22. Luthra S. States see peer-recovery coaches as a way to break the addiction epidemic [Web]. San Francisco, California: Kaiser Health News; 2016 [Available from: <https://khn.org/news/states-see-peer-recovery-coaches-as-a-way-to-break-the-addiction-epidemic/>].
23. United States Department of Health and Human Services. 2-year Restricted Use Data Analysis System (2016-2017) [Internet]. Rockville, Maryland: Substance Abuse and Mental Health Services Administration; 2018 [Available from: <https://rdas.samhsa.gov/#/survey/NSDUH-2016-2017-RD02YR>].

- 1
  - 2
  - 3
  - 4
  - 5
  - 6
  - 7
  - 8
  - 9
  - 10
  - 11
  - 12
  - 13
  - 14
  - 15
  - 16
  - 17
  - 18
  - 19
  - 20
  - 21
  - 22
  - 23
  - 24
  - 25
  - 26
  - 27
  - 28
  - 29
  - 30
  - 31
  - 32
  - 33
  - 34
  - 35
  - 36
  - 37
  - 38
  - 39
  - 40
  - 41
  - 42
  - 43
  - 44
  - 45
  - 46
  - 47
  - 48
  - 49
  - 50
  - 51
  - 52
  - 53
  - 54
  - 55
  - 56
  - 57
  - 58
  - 59
  - 60
24. Centers for Disease Control and Prevention. Multiple Cause of Death, 1999-2017 [Internet]. Hyattsville, Maryland: National Center for Health Statistics; 2019 [Available from: <https://wonder.cdc.gov/mcd-icd10.html>].
25. Vilsaint CL, Kelly JF, Bergman BG, Groshkova T, Best D, White W. Development and validation of a Brief Assessment of Recovery Capital (BARC-10) for alcohol and drug use disorder. *Drug Alcohol Depend.* 2017;177:71-6.
26. De Leon G, Jainchill N. Circumstances, motivation, readiness, and suitability as correlates of treatment tenure. *J Psychoactive Drugs.* 1986;18(3):203-8.
27. Kayman DJ, Goldstein MF, Deren S, Rosenblum A. Predicting treatment retention with a brief "Opinions about Methadone" scale. *J Psychoactive Drugs.* 2006;38(1):93-100.
28. Luoma JB, O'Hair AK, Kohlenberg BS, Hayes SC, Fletcher L. The development and psychometric properties of a new measure of perceived stigma toward substance users. *Subst Use Misuse.* 2010;45(1-2):47-57.
29. Keller S, Bann CM, Dodd SL, Schein J, Mendoza TR, Cleeland CS. Validity of the Brief Pain Inventory for use in documenting the outcomes of patients with non-cancer pain. *Clin J Pain.* 2004;20(5):309-18.
30. Gossop M. The development of a short opiate withdrawal scale (SOWS). *Addict Behav.* 1990;15(5):487-90.
31. Radloff LS. The CES-D Scale: A self-report depression scale for research in the general population. *Appl Psychol Meas.* 1977;1(3):385-401.
32. State of Rhode Island. Reporting Requirements - RI BHOLD [Internet]. Providence, Rhode Island: Department of Behavioral Healthcare, Developmental Disabilities, and Hospitals; 2019 [Available from: <http://www.bhddh.ri.gov/sections/reporting.php>].
33. State of Rhode Island. Prescription Drug Monitoring Program [Internet]. Providence, Rhode Island: Department of Health; 2019 [Available from: <http://health.ri.gov/healthcare/medicine/about/prescriptiondrugmonitoringprogram/>].
34. Adams LL. The role of health information technology in improving quality and safety in RI: Can new money solve old problems? *R I Med J.* 2009;98(8):267-8.
35. Rowe C, Vittinghoff E, Santos G-M, Behar E, Turner C, Coffin PO. Performance measures of diagnostic codes for detecting opioid overdose in the emergency department. *Acad Emerg Med.* 2017;24(4):475-83.
36. Ellison J, Walley AY, Feldman JA, Bernstein E, Mitchell PM, Koppelman EA, et al. Identifying patients for overdose prevention with ICD-9 classification in the emergency department, Massachusetts, 2013-2014. *Public Health Rep.* 2016;131(5):671-5.



- 1  
2  
3 37. McCormick M, Koziol JA, Sanchez K. Development and use of a new opioid overdose surveillance  
4 system, 2016. *R I Med J*. 2017;100(4):37-9.  
5  
6 38. Samuels EA, Bernstein SL, Marshall BDL, Krieger M, Baird JR, Mello MJ. Peer navigation and  
7 take-home naloxone for opioid overdose emergency department patients: Preliminary patient  
8 outcomes. *J Subst Abuse Treat*. 2018;94:29-34.  
9  
10 39. Broglio K. Randomization in clinical trials: Permuted blocks and stratification. *JAMA*.  
11 2018;319(21):2223-4.  
12  
13 40. State of Rhode Island. Rhode Island's Strategic Plan on Addiction and Overdose: Four Strategies to  
14 Alter the Course of an Epidemic. Providence, Rhode Island: Governor's Overdose Prevention and  
15 Intervention Task Force; 2015.  
16  
17 41. Marshall BDL, Yedinak JL, Goyer J, Green TC, Koziol JA, Alexander-Scott N. Development of a  
18 statewide, publicly accessible drug overdose surveillance and information system. *Am J Public*  
19 *Health*. 2017;107(11):1760-3.  
20  
21 42. McClellan C, Lambdin BH, Ali MM, Mutter R, Davis CS, Wheeler E, et al. Opioid-overdose laws  
22 association with opioid use and overdose mortality. *Addict Behav*. 2018;86:90-5.  
23  
24 43. Koester S, Mueller SR, Raville L, Langegger S, Binswanger IA. Why are some people who have  
25 received overdose education and naloxone reticent to call emergency medical services in the event  
26 of overdose? *Int J Drug Policy*. 2017;48:115-24.  
27  
28  
29  
30  
31  
32  
33  
34  
35  
36  
37  
38  
39  
40  
41  
42  
43  
44  
45  
46  
47  
48  
49  
50  
51  
52  
53  
54  
55  
56  
57  
58  
59  
60

**Authors' Contributions:**

WCG led the manuscript preparation. The research was conceived by FLB and BDLM. All authors provided feedback on several drafts of the study protocol and this manuscript. WCG, BDLM, EAS, MGB, DD, KJL, LM, RCM, TN, GAO, SER, JYL, and FLB read and approved of the final manuscript.

**Funding Statement:**

This research is funded by a grant from the Laura and John Arnold Foundation (Principal Investigators: Francesca L. Beaudoin, MD, PhD and Brandon D.L. Marshall, PhD) with support from the Center for Biomedical Research Excellence (COBRE) on Opioids and Overdose at Rhode Island Hospital (funded by the National Institute of General Medical Sciences, Award: P20GM125507; Principal Investigator: Josiah D. Rich, MD). In addition, Mr. Goedel is supported by the Brown University Clinical and Community-Based HIV Research Training Fellowship (funded by the National Institute of Mental Health, Award: R25MH083620; Principal Investigator: Amy S. Nunn, ScD).

**Declarations of Competing Interest:**

The authors declare no competing interests.

**Word Count:** 3,435 words

1  
2  
3 **Figure 1. Intervention arms in a randomized clinical trial of an emergency department-based peer**  
4 **recovery support intervention to increase treatment uptake and reduce recurrent overdose among**  
5 **individuals at high risk for opioid overdose**  
6  
7  
8  
9  
10  
11  
12  
13  
14  
15  
16  
17  
18  
19  
20  
21  
22  
23  
24  
25  
26  
27  
28  
29  
30  
31  
32  
33  
34  
35  
36  
37  
38  
39  
40  
41  
42  
43  
44  
45  
46  
47  
48  
49  
50  
51  
52  
53  
54  
55  
56  
57  
58  
59  
60

For peer review only

| Certified Peer Recovery Specialist |                                                                                                                                                                                                                                                                    | Licensed Clinical Social Worker |                                                                                                                                                                                                                         |
|------------------------------------|--------------------------------------------------------------------------------------------------------------------------------------------------------------------------------------------------------------------------------------------------------------------|---------------------------------|-------------------------------------------------------------------------------------------------------------------------------------------------------------------------------------------------------------------------|
| 1                                  | <u>Enrollment Visit in Emergency Department</u> <ul style="list-style-type: none"> <li>• Intervention based on motivational interviewing plus lived experience of peer recovery specialist</li> <li>• Navigate barriers to treatment, provide referrals</li> </ul> | 1                               | <u>Brief Intervention in Emergency Department</u> <ul style="list-style-type: none"> <li>• Intervention based on motivational interviewing plus other clinical skills</li> <li>• Provide referrals as needed</li> </ul> |
| 2                                  | <u>Community-Based Follow-Up Visit (&lt;48 hours)</u> <ul style="list-style-type: none"> <li>• Navigate barriers to treatment and recovery</li> <li>• Ongoing peer support</li> <li>• Ongoing overdose prevention education</li> </ul>                             |                                 |                                                                                                                                                                                                                         |
| 3                                  | <u>Retention in Peer Recovery Support (≥90 days)</u> <ul style="list-style-type: none"> <li>• Promote retention in treatment</li> <li>• Ongoing peer support</li> <li>• Ongoing overdose prevention education</li> </ul>                                           |                                 |                                                                                                                                                                                                                         |

Figure 1

# BMJ Open

## A Randomized Clinical Trial of an Emergency Department-Based Peer Recovery Support Intervention to Increase Treatment Uptake and Reduce Recurrent Overdose among Individuals at High Risk for Opioid Overdose: Study Protocol for the Navigator Trial

|                                 |                                                                                                                                                                                                                                                                                                                                                                                                                                                                                                                                                                                                                                                                                                                                                                                                                                                                                                                                                                                                                                                                                                                                                                                                                                                                                                                                                                                                                           |
|---------------------------------|---------------------------------------------------------------------------------------------------------------------------------------------------------------------------------------------------------------------------------------------------------------------------------------------------------------------------------------------------------------------------------------------------------------------------------------------------------------------------------------------------------------------------------------------------------------------------------------------------------------------------------------------------------------------------------------------------------------------------------------------------------------------------------------------------------------------------------------------------------------------------------------------------------------------------------------------------------------------------------------------------------------------------------------------------------------------------------------------------------------------------------------------------------------------------------------------------------------------------------------------------------------------------------------------------------------------------------------------------------------------------------------------------------------------------|
| Journal:                        | <i>BMJ Open</i>                                                                                                                                                                                                                                                                                                                                                                                                                                                                                                                                                                                                                                                                                                                                                                                                                                                                                                                                                                                                                                                                                                                                                                                                                                                                                                                                                                                                           |
| Manuscript ID                   | bmjopen-2019-032052.R1                                                                                                                                                                                                                                                                                                                                                                                                                                                                                                                                                                                                                                                                                                                                                                                                                                                                                                                                                                                                                                                                                                                                                                                                                                                                                                                                                                                                    |
| Article Type:                   | Protocol                                                                                                                                                                                                                                                                                                                                                                                                                                                                                                                                                                                                                                                                                                                                                                                                                                                                                                                                                                                                                                                                                                                                                                                                                                                                                                                                                                                                                  |
| Date Submitted by the Author:   | 30-Aug-2019                                                                                                                                                                                                                                                                                                                                                                                                                                                                                                                                                                                                                                                                                                                                                                                                                                                                                                                                                                                                                                                                                                                                                                                                                                                                                                                                                                                                               |
| Complete List of Authors:       | Goedel, William; Brown University School of Public Health, Department of Epidemiology<br>Marshall, Brandon; Brown University, Department of Epidemiology<br>Samuels, Elizabeth; Brown University Warren Alpert Medical School, Department of Emergency Medicine<br>Brinkman, Mark; Rhode Island Hospital, Department of Emergency Medicine<br>Dettor, Debra; Anchor Recovery Community Center<br>Langdon, Kirsten; Brown University Warren Alpert Medical School, Department of Psychiatry and Human Behavior<br>Mahoney, Linda; Rhode Island Department of Behavioral Healthcare Developmental Disabilities and Hospitals<br>Merchant, Roland; Brown University School of Public Health, Department of Epidemiology; Brown University Warren Alpert Medical School, Department of Emergency Medicine<br>Nizami, Tarek; Rhode Island Hospital, Department of Emergency Medicine<br>O'Toole, George; Anchor Recovery Community Center<br>Ramsey, Susan; Brown University Warren Alpert Medical School, Department of Psychiatry and Human Behavior; Brown University Warren Alpert Medical School, Department of Medicine<br>Yedinak, Jesse; Brown University School of Public Health, Department of Epidemiology<br>Beaudoin, Francesca L; Brown University Warren Alpert Medical School, Department of Emergency Medicine; Brown University School of Public Health, Department of Health Services, Policy, and Practice |
| <b>Primary Subject Heading</b>: | Addiction                                                                                                                                                                                                                                                                                                                                                                                                                                                                                                                                                                                                                                                                                                                                                                                                                                                                                                                                                                                                                                                                                                                                                                                                                                                                                                                                                                                                                 |
| Secondary Subject Heading:      | Emergency medicine, Public health, Patient-centred medicine, Evidence based practice                                                                                                                                                                                                                                                                                                                                                                                                                                                                                                                                                                                                                                                                                                                                                                                                                                                                                                                                                                                                                                                                                                                                                                                                                                                                                                                                      |
| Keywords:                       | ACCIDENT & EMERGENCY MEDICINE, PUBLIC HEALTH, Substance misuse < PSYCHIATRY                                                                                                                                                                                                                                                                                                                                                                                                                                                                                                                                                                                                                                                                                                                                                                                                                                                                                                                                                                                                                                                                                                                                                                                                                                                                                                                                               |
|                                 |                                                                                                                                                                                                                                                                                                                                                                                                                                                                                                                                                                                                                                                                                                                                                                                                                                                                                                                                                                                                                                                                                                                                                                                                                                                                                                                                                                                                                           |

1  
2  
3  
4  
5  
6  
7  
8  
9  
10  
11  
12  
13  
14  
15  
16  
17  
18  
19  
20  
21  
22  
23  
24  
25  
26  
27  
28  
29  
30  
31  
32  
33  
34  
35  
36  
37  
38  
39  
40  
41  
42  
43  
44  
45  
46  
47  
48  
49  
50  
51  
52  
53  
54  
55  
56  
57  
58  
59  
60

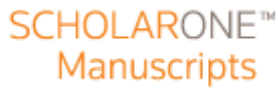

1  
2  
3 **A Randomized Clinical Trial of an Emergency Department-Based Peer Recovery Support**  
4 **Intervention to Increase Treatment Uptake and Reduce Recurrent Overdose among Individuals at**  
5 **High Risk for Opioid Overdose: Study Protocol for the Navigator Trial**  
6  
7  
8

9 William C. Goedel, BA<sup>1</sup>

10 Brandon D.L. Marshall, PhD<sup>1</sup>

11 Elizabeth A. Samuels, MD, MPH<sup>2</sup>

12 Mark G. Brinkman, BS<sup>3</sup>

13 Debra Dettor, MS, CPRS<sup>4</sup>

14 Kirsten J. Langdon, PhD<sup>5</sup>

15 Linda Mahoney, CAADC, CCS<sup>6</sup>

16 Roland C. Merchant, MD, ScD, MPH<sup>1,2</sup>

17 Tarek Nizami, MD<sup>3</sup>

18 George A. O'Toole, BS, CPRS<sup>4</sup>

19 Susan E. Ramsey, PhD<sup>5,7</sup>

20 Jesse L. Yedinak, MPA<sup>1</sup>

21 Francesca L. Beaudoin, MD, PhD<sup>2,8</sup>

22  
23  
24  
25  
26  
27  
28  
29  
30  
31 1. Department of Epidemiology, School of Public Health, Brown University, Providence, RI

32 2. Department of Emergency Medicine, Warren Alpert Medical School, Brown University, Providence, RI

33 3. Department of Emergency Medicine, Rhode Island Hospital, Providence, RI

34 4. Anchor Recovery Community Center, Pawtucket, RI

35 5. Department of Psychiatry and Human Behavior, Warren Alpert Medical School, Brown University, Providence, RI

36 6. Rhode Island Department of Behavioral Healthcare, Developmental Disabilities, and Health, Cranston, RI

37 7. Department of Medicine, Warren Alpert Medical School, Brown University, Providence, RI

38 8. Department of Health Services, Policy, and Practice, School of Public Health, Brown University, Providence, RI

39  
40  
41  
42  
43  
44 **Address Correspondence to:**

45 Francesca L. Beaudoin, MD, PhD; Brown University Alpert Medical School Department of Emergency  
46 Medicine; 55 Claverick Street, 2nd Floor, Providence, Rhode Island, United States, 02903. E-mail Address:  
47 francesca\_beaudoin@brown.edu. Phone Number: (401) 444-5411. Fax Number: (401) 444-4307.  
48  
49  
50  
51  
52  
53  
54  
55  
56  
57  
58  
59  
60

## ABSTRACT

**Introduction:** Effective approaches to increase engagement in treatment for opioid use disorder (OUD) and reduce the risk of recurrent overdose and death following emergency department (ED) presentation for opioid overdose remain unknown. As such, we aim to compare the effectiveness of behavioral interventions delivered in the ED by certified peer recovery support specialists relative to those delivered by licensed clinical social workers (LCSWs) in promoting OUD treatment uptake and reducing recurrent ED visits for opioid overdose.

**Methods and Analysis:** Adult ED patients who are at high risk for opioid overdose (i.e., are being treated for an opioid overdose or identified by the treating physician as having OUD) ( $n = 650$ ) will be recruited from two emergency departments in a single health care system in Providence, Rhode Island into a two-arm randomized trial with 18 months of follow-up post-randomization. Eligible participants will be randomly assigned (1:1) in the ED to receive a behavioral intervention from a certified peer recovery support specialist or a behavioral intervention from an LCSW. The primary outcomes are engagement in formal OUD treatment within 30 days of the initial ED visit and recurrent ED visits for opioid overdose within 18 months of the initial ED visit, as measured through statewide administrative records.

**Ethics and Dissemination:** This protocol was approved by the Rhode Island Hospital institutional review board (Approval Number: 212418). Data will be presented at national and international conferences and published in peer-reviewed journals.

**Trial Registration:** NCT03684681 (ClinicalTrials.gov)

## KEYWORDS

Opioid Overdose; Emergency Department; Peer Support; Recovery; Randomized Trial



### STRENGTHS AND LIMITATIONS

- This study represents the first randomized controlled trial to assess the impact of a peer recovery support intervention on uptake of OUD treatment and recurrent ED presentation for opioid-involved overdose.
- This study leverages a statewide comprehensive data sharing infrastructure to use administrative records to characterize the primary outcomes (e.g., OUD treatment enrollment, recurrent ED presentation), thus overcoming biases associated with self-reported outcomes and loss to follow-up in previous studies.
- Although the administrative databases used to characterize the primary outcomes are meant to be representative, they are by no means comprehensive (i.e., individuals who enroll in OUD treatment programs or who present to EDs in other states will not be captured in these resources).

## INTRODUCTION

### Background and Rationale

Deaths attributable to accidental drug overdose, particularly those involving opioids, have reached epidemic levels in the United States (US) (1-4). In the past two decades, US overdose mortality rates have more than doubled, from 6.2 per 100,000 persons in 2000 to 21.7 per 100,000 persons in 2017 (2, 3). There have been 700,000 opioid overdose deaths between 2000 to 2015 in the US (5), and the crisis that is expected to worsen under current trends (6). Since 2013, the opioid overdose epidemic has been marked by significant increases in deaths involving powerful synthetic opioids (e.g., fentanyl) (3). The burden of the drug overdose epidemic is greatly elevated in New England, where fentanyl has been present in the illicit drug supply since as early as 2012 (7-10). Rhode Island has one of the highest drug overdose rates in the nation (3), and in 2014 reported the third and fourth highest rate of opioid-related emergency department (ED) visits and inpatient hospital stays, respectively (11).

In addition to increases in fatal opioid overdoses, EDs have had substantial increases in visits for non-fatal opioid overdoses (12-14). About 120,000 ED visits were reported for suspected non-fatal opioid overdoses between July 2016 and September 2017 in sixteen states participating in the Enhanced State Opioid Overdose Surveillance, representing a 35% increase over this period (15). As such, the ED serves as a critical intervention site for providing services to people at high risk of opioid overdose and those with opioid use disorder (OUD). In the year after presenting to the ED for a drug overdose, a person is at heightened risk for death (16, 17). In a nested case-control study in New York, the odds of death due to prescription drug overdose were 4.9 times higher for those with two ED visits, 16.6 times higher for those with three ED visits, and 48.2 times higher for those with four or more visits relative to one ED visit or less in the year preceding death (16). Thus, the ED is both a critical and timely place for intervention and the reason for the ED visit itself (i.e., overdose) can be used as an opportunity to identify patients at highest risk of fatal drug overdose and deliver interventions (18).

The most effective means to promote engagement in substance use disorder (SUD) treatment and reduce the risk of recurrent overdose and death following presentation to an ED for opioid overdose remains unknown. One of the only randomized studies of overdose education combined with a brief motivational interviewing-based intervention delivered in the ED by licensed mental health counselors resulted in reductions in overdose risk behaviors among individuals presenting to the ED and reporting non-medical prescription opioid use (Bohnert et al., 2016). However, a trial deploying a similar intervention did not reduce overdose rates or prevent subsequent ED visits or hospitalizations compared to usual care (19). It is possible, however, that these types of interventions may be more effective if delivered by people with lived

1  
2  
3 experiences with SUD and recovery. Peer-based interventions are an effective component of care across  
4 non-clinical settings and in other aspects of health care for other conditions (20). A recent systematic review  
5 by Ramchand and colleagues (2017) found that group-based interventions that use peers as educators  
6 commonly improve knowledge, attitudes, beliefs, and perceptions and improve connectedness and  
7 engagement with health promotion activities (20). Further, a recent systematic review of peer recovery  
8 support services in care for substance use disorder found that existing randomized controlled trials have  
9 been subject to several limitations, particularly poorly defined and non-manualized roles for peers, and, as  
10 such, there remains a need for more rigorous evaluation to determine the efficacy, effectiveness, and cost-  
11 effectiveness of peer recovery support services (21). However, little is known about their effectiveness in  
12 improving outcomes for persons at high risk for opioid overdose. In response to Rhode Island's overdose  
13 crisis, individuals in long-term recovery with specialized training in SUD management, known as certified  
14 peer recovery support specialists, have been deployed in EDs since 2014 (22). The goal of their work is to  
15 help patients navigate obstacles to recovery through problem-solving, goal setting, avoiding relapse  
16 triggers, and planning and obtaining services. Despite the promise of and significant national interest in this  
17 approach (23), no studies have rigorously evaluated whether peer-based behavioral interventions delivered  
18 in the ED result in improved outcomes for patients at high risk of opioid overdose.  
19  
20  
21  
22  
23  
24  
25  
26  
27  
28  
29

### 30 **Objectives**

31 We aim to test the effectiveness of behavioral interventions delivered in the ED by certified peer recovery  
32 support specialists in improving outcomes for patients at high risk of opioid overdose relative to those  
33 delivered by licensed clinical social workers (LCSWs). We hypothesize that, because certified peer  
34 recovery support specialists are able to draw from their own lived experiences with SUD and recovery,  
35 patients who are randomly assigned to receive a behavioral intervention from a peer recovery support  
36 specialist, as compared to receiving an intervention from an LCSW, will be: (1) more likely to engage in  
37 formal SUD treatment within 30 days following the initial visit, and (2) less likely to experience a recurrent  
38 ED visit for an opioid overdose during the succeeding 18 months.  
39  
40  
41  
42  
43  
44  
45

### 46 **Trial Design**

47 The trial utilizes a parallel design where patients at high risk for opioid overdose who present to the ED are  
48 randomly assigned 1:1 to receive a behavioral intervention from a certified peer recovery support specialist  
49 or an LCSW.  
50  
51  
52  
53

## 54 **METHODS: PARTICIPANTS, INTERVENTIONS, OUTCOMES**

### 55 **Study Setting**

1  
2  
3 Rhode Island is home to over one million residents. Since 2000, the state has experienced a high burden of  
4 opioid overdose. According to the 2016–2017 cycle of the National Survey on Drug Use and Health, 4.7%  
5 of Rhode Islanders used heroin or misused a prescription opioid in the past year (24). Between 2013 and  
6 2017, the age-adjusted rate of death due to opioid overdose increased by 44.2%, from 18.1 to 26.1 per  
7 100,000 persons, with these increases largely driven by synthetic opioids other than methadone (16.8% of  
8 opioid overdose deaths in 2013 versus 72.6% in 2017) (25).  
9  
10  
11  
12  
13

### 14 **Eligibility Criteria**

15  
16 To be eligible, participants must also be in the ED because they are: (1) being treated for an opioid overdose;  
17 (2) receiving treatment related to OUD (e.g., infectious complication, withdrawal); or (3) self-report an  
18 opioid overdose within the previous 12 months. The presence of an opioid overdose will be determined by  
19 the treating physician and is generally defined as (1) the presence of decreased levels of consciousness or  
20 respiratory depression and (2) occurring after the consumption of opioids or resolving after the  
21 administration of naloxone. Potential participants will be deemed ineligible if they are critically ill or  
22 injured, have previously enrolled in the trial, are in police custody or incarcerated, pregnant, or live outside  
23 of Rhode Island. Patients who are critically ill or injured will be eligible for screening and enrollment once  
24 cleared to participate by their treating physician.  
25  
26  
27  
28  
29  
30

### 31 **Patient and Public Involvement**

32 No patient involved.  
33  
34  
35

### 36 **Interventions**

#### 37 Current Standard of Care

38  
39 The current standard of care following an ED visit for an opioid overdose at the study sites is to receive a  
40 behavioral intervention delivered by a certified peer recovery support specialist or an LCSW. Whether a  
41 patient is evaluated by a social worker or a peer recovery support specialist can depend on the time of day,  
42 staff availability, and preferences or views of the provider or patient. In the trial, patients will be randomly  
43 assigned to receive a behavioral intervention in the ED delivered by (1) a staff LCSW, or (2) a certified  
44 peer recovery support specialist trained by the Anchor Recovery Community Center (Figure 1).  
45  
46  
47  
48  
49

#### 50 Behavioral Intervention Delivered by Certified Peer Recovery Support Specialists

51  
52 The Anchor Recovery Community Center is Rhode Island's first community-based peer recovery center  
53 (22). It is designed as an access point for those with SUD, providing services such as job counseling, health  
54 and wellness activities, and individualized long-term peer recovery coaching (22). Through one of its  
55  
56  
57  
58  
59  
60

1  
2  
3 outreach programs, known as AnchorED, the Anchor Recovery Community Center has deployed certified  
4 peer recovery support specialists to EDs across Rhode Island since 2014 (22). As part of AnchorED,  
5 certified peer recovery support specialists arrive in the ED within 30 minutes of consultation, assess  
6 individuals for readiness to seek treatment, provide linkage to treatment, and educate patients on overdose  
7 prevention and response (22). Peer recovery specialists call every day for ten days in an attempt to make  
8 contact following discharge from the ED. Once contact is made, peer recovery specialists and their clients  
9 make plans for regular contact and follow-up.  
10  
11  
12  
13  
14  
15

16 To become a certified peer recovery support specialist, applicants must be in recovery for at least two years,  
17 undergo a 45-hour training program at Anchor Recovery Community Center based on the Connecticut  
18 Community for Addiction Recovery curriculum, and accrue 500 hours of supervised work experience  
19 providing peer recovery support services (22). All peer recovery support specialists obtain certification  
20 from the International Certification and Reciprocity Consortium (22). The certification program focuses on  
21 advocacy, wellness and recovery, motivational interviewing techniques, mentoring and education, and  
22 ethics as well as additional training on the provision of trauma-informed care and the transtheoretical model  
23 of behavior change. In addition to employing motivational interviewing techniques, peer recovery support  
24 specialists support individuals' self-efficacy and prevent relapse by addressing social, environmental, and  
25 personal factors, such as awareness and avoidance of relapse triggers, polysubstance use, stigma associated  
26 with SUD and their treatment, knowledge of treatment services (including the use of medications for OUD  
27 treatment), and addressing financial and transportation barriers to treatment (22). Certified peer recovery  
28 support specialists are uniquely positioned to deliver behavioral interventions to individuals who have  
29 experienced overdose as they couple their training with lived experiences of SUD and recovery (22).  
30  
31  
32  
33  
34  
35  
36  
37  
38  
39

#### 40 Behavioral Intervention Delivered via Licensed Clinical Social Workers

41 There are 35 full and part-time LCSW on staff in the Department of Social Work between the two study  
42 sites. Staff social workers arrive in the ED within 30 minutes of consultation. Staff social workers are  
43 trained and available to deliver interventions to patients presenting with an opioid overdose and/or with  
44 OUD in the ED. As LCSWs, these individuals are capable of delivering a variety of interviewing and  
45 intervention techniques that are rooted in social work theory and practice models. Social work practice  
46 models are strategies that the social worker can incorporate into their interventions to help people meet their  
47 goals (e.g., task-centered practice, cognitive behavioral therapy, crisis intervention model). Although the  
48 intervention delivered by LCSWs and their associated theoretical underpinnings are similar in some  
49 respects to those associated with those delivered by certified peer recovery support specialists, the social  
50 worker intervention is intended to be a single session with referral to SUD treatment.  
51  
52  
53  
54  
55  
56  
57  
58  
59  
60

## Outcomes

### Primary Outcomes

The two primary outcomes of the trial are (1) engagement with a formal SUD treatment program within 30 days of the initial ED visit, and (2) recurrent ED visit(s) for a suspected opioid overdose over 18 months. Both endpoints will be assessed via statewide administrative databases as outlined below. All records will be linked deterministically to participant data using identifiable information in a secure, Health Insurance Portability and Accountability Act (HIPAA)-compliant computing environment.

The first primary outcome of the trial is treatment engagement, defined as admission to a formal, publicly licensed SUD treatment program within 30 days of the initial ED visit. The Rhode Island Department of Behavioral Health, Developmental Disabilities, and Hospitals (BHDDH) maintains the Behavioral Health Online Database (BHOLD), a state database containing information on all admission and discharge events of clients of all licensed behavioral healthcare organizations in the state (26). BHOLD is a comprehensive database on all licensed treatment programs, including inpatient detoxification programs, day treatment programs, residential treatment programs, intensive outpatient programs, and opioid treatment programs (26). Records in BHOLD include individuals who receive methadone or buprenorphine from a licensed opioid treatment program. In addition to this data resource, records from the prescription drug monitoring program (PDMP) maintained by the Rhode Island Department of Health will be used to supplement BHOLD to identify patients who initiate buprenorphine in office-based settings (27).

The second primary outcome of the trial is recurrent visits to the ED for a suspected opioid overdose, defined as receipt of treatment in an ED in Rhode Island for an opioid overdose within the 18 months following the initial ED visit at the two sites. The Rhode Island Quality Institute maintains CurrentCare, a health information exchange that provides a unified data system for EMRs for all major health systems in Rhode Island, allowing us to identify repeat visits for suspected opioid overdoses at all twelve EDs in the state (28). Opioid overdoses will be defined according to the Centers for Disease Control and Prevention (CDC) guidelines for all opioid poisonings and utilize International Classification of Disease (ICD) codes (29, 30). The Rhode Island Department of Health mandates that all suspected overdoses presenting to a hospital be reported to the department within 48 hours. This data source, referred to as the 48-hour overdose surveillance system (31), will be used to supplement the EMRs in CurrentCare.

### Sample Size

1  
2  
3 Based on preliminary assessments from the study sites, we are assuming that 7% of participants assigned  
4 to receive a behavioral intervention from an LCSW will enroll in a formal SUD treatment program within  
5 30 days of their ED visit. Given this assumption for a sample size of 650 participants, we have at least 80%  
6 power to detect a two-fold increase in treatment engagement among participants assigned to receive a  
7 behavioral intervention from a peer recovery specialist (Effect Size: 0.07; 95% CI: 0.02–0.12). This two-  
8 fold increase was identified by community stakeholders as an appropriate benchmark for this outcome.  
9 Based on a recent medical record review from one of the study sites and estimates from other studies (19,  
10 32), we are assuming that 15% of participants who receive a behavioral intervention from an LCSW will  
11 experience a subsequent repeat ED visit for opioid overdose. Given this assumption and our sample, we  
12 have at least 80% power to detect a 50% relative reduction in the risk of recurrent ED visits for opioid  
13 overdose within 18 months following the initial visit among those assigned to receive a behavioral  
14 intervention from a peer recovery specialist (Effect Size: 0.075; 95% CI: 0.02–0.13).  
15  
16  
17  
18  
19  
20  
21  
22  
23

## 24 **Recruitment**

25 Participants will be recruited from two EDs—Level 1 and Level 2 trauma centers—located in the state’s  
26 capital of Providence. Together, these two EDs receive over 175,000 adult visits each year. Between 2017  
27 and 2018, the two EDs reported a total of 1,446 visits for suspected opioid overdoses, representing 45% of  
28 all ED visits for suspected opioid overdose reported to the Rhode Island Department of Health ( $n = 3,239$ ).  
29 A consecutive sample of ED patients will be assessed for eligibility by one of eleven full-time research  
30 assistants employed in the two EDs who can recruit participants 24 hours per day, seven days per week.  
31 Potential participants will be identified by the research assistants by screening electronic medical records  
32 (EMRs) or by referral from treating providers in the ED. Potential participants will be considered eligible  
33 if they are 18 years of age or older and speak English. Given the specificity of the pool of LCSWs and  
34 certified peer recovery support specialists to the ED, recruitment will occur in the ED only.  
35  
36  
37  
38  
39  
40  
41  
42

## 43 **METHODS: ASSIGNMENT OF INTERENTIONS**

### 44 **Allocation**

45 Participants will be randomly assigned 1:1 within each study site to receive either a behavioral intervention  
46 delivered by a certified peer recovery support specialist or by an LCSW. Allocations will be randomly  
47 assigned using the REDCap randomization feature. The randomization schedule will be maintained by a  
48 data manager not involved with participant recruitment or the final study analyses.  
49  
50  
51  
52  
53  
54  
55  
56  
57  
58  
59  
60



### **Blinding (Masking)**

Participants and providers cannot be blinded to their intervention assignment. However, research assistants who are responsible for the follow-up assessments and investigators and analysts performing the study analyses will be blinded to arm allocation.

## **METHODS: DATA COLLECTION, MANAGEMENT, ANALYSIS**

### **Data Collection Methods**

While the primary outcomes assessments will rely on the use of administrative data (see below), we will also collect patient-reported assessments at baseline and follow-up. Baseline assessments will be administered by a research assistant in the ED to collect information about sociodemographic characteristics, medical history, medication use, substance use patterns, prior substance use treatment engagement, recovery capital (33), treatment readiness (34), opinions about medications for OUD treatment (35), perceived stigma towards people who use drugs (36), symptoms of pain (37), opioid withdrawal (38), and depression (39) using established instruments. Follow-up assessments will be conducted at 30 days, three months, and six months post-discharge, respectively.

### **Data Management**

All data collection instruments will be designed using Research Electronic Data Capture (REDCap) software and administered using a tablet computer connected to the wireless network at the two study sites. All follow-up assessments will be conducted via telephone by a research assistant, and all responses will be directly entered into REDCap.

### **Statistical Methods**

We will use an intention-to-treat (ITT) approach in all analyses to estimate the average treatment effect. A sensitivity analysis will be conducted using a per-protocol approach with a sample restricted to those who complete their interventions. For the two primary outcomes (engagement in formal SUD treatment within 30 days of the initial ED visit and occurrence of a subsequent ED visit for opioid overdose within 18 months of the initial ED visit), we will use separate logistic regression models with indicators for treatment allocation and study site, as well as term representing the interaction of treatment allocation with study site. Second, we will conduct subgroup analyses to understand potential heterogeneity of treatment effects by age and gender.

## **METHODS: MONITORING**

### **Data Monitoring**



1  
2  
3 A single data safety monitoring board (DSMB) will be convened and include members external to the  
4 research team and funding source and without potential conflicts of interest. The DSMB will be notified  
5 within 24 hours of any serious adverse event in which the relationship to the study is possible. The DSMB  
6 will convene at the earliest possible time (no more than 30 days from time of notification) to discuss this  
7 adverse event. Further, the DSMB will meet on a quarterly basis with the study coordinator and co-principal  
8 investigators to review protocol adherence and adverse events.  
9  
10  
11  
12  
13

### 14 **Harms**

15 An adverse event is considered any physical or clinical change experienced by the patient, including the  
16 onset of new symptoms or the exacerbation of pre-existing conditions. Adverse events assessment will be  
17 performed at each follow-up assessment at 30 days, three months, and six months post-discharge.  
18  
19  
20  
21

## 22 **ETHICS AND DISSEMINATION**

### 23 **Research Ethics Approval**

24 All protocols have been approved by the institutional review boards at the Lifespan health system  
25 representing the two clinical sites (Approval Number: 212418).  
26  
27  
28  
29

### 30 **Protocol Amendments**

31 Any modifications to the protocol which may impact on the conduct of the study, potential benefit of the  
32 patient, or may affect patient safety, including changes of study objectives, study design, patient population,  
33 sample sizes, study procedures, or significant administrative aspects will require a formal amendment.  
34  
35  
36  
37

### 38 **Consent**

39 Training research assistants will introduce and discuss the trial with potential participants. These potential  
40 participants will then be able to have an informed discussion with the research assistant about their potential  
41 participation. Following this discussion research assistants will obtain written informed consent.  
42  
43  
44  
45

### 46 **Confidentiality**

47 The privacy of all trial participants is protected by a Certificate of Confidentiality issued by the National  
48 Institutes of Health. Unique identification numbers will be assigned to participants. All data forms and  
49 interviews will be coded with this number rather than with a name. All paper forms will be stored in locked  
50 file cabinets. Informed consent documents will be stored separately, as they contain identifying information.  
51 Upon completion of the study, identifying information will be destroyed.  
52  
53  
54  
55  
56  
57  
58  
59  
60

### **Access to Data**

The institutional review boards at the Lifespan health system representing the two clinical sites will have access to anonymized data at their discretion. However, no third-party investigators will have access to study data prior to synthesis and dissemination.

### **Dissemination Policy**

The study has been registered on ClinicalTrials.gov. A summary of the trial's results will be published there when available. Results will be published at national scientific meetings and the final results will be submitted for publication in peer-reviewed journals.

### **DISCUSSION**

The AnchorED program of Anchor Recovery Community Center, which deploys certified peer recovery support specialists to EDs across Rhode Island to deliver behavioral interventions to individuals who have experienced an opioid overdose, is the first statewide program of its kind in the nation (22). Despite a lack of evidence to demonstrate the effectiveness of this program and improved long-term outcomes for patients, several other jurisdictions in the US have created or are initiating programs based on the AnchorED model (23). Given the intense interest in peer recovery models, the results of this trial have a strong potential to fundamentally change clinical practice paradigms for treating patients at high risk for opioid overdose who present to EDs across the nation.

The current study benefits from support from a unique policy environment in Rhode Island. In 2015, Governor Gina Raimondo signed an executive order to establish the Rhode Island Overdose Prevention and Intervention Task Force, which charged experts to develop a strategic plan to guide efforts to tackle the state's overdose crisis (40). An important outcome of this plan was a comprehensive data sharing infrastructure between key state agencies (including the Rhode Island Departments of Health and Behavioral Healthcare, Developmental Disabilities, and Hospitals) and academic researchers (41). These data sharing agreements offer unprecedented access to population-based data on overdose morbidity and mortality (41). As a result, the trial investigators can create a large database linking participant data with multiple administrative databases to ascertain our primary and secondary outcomes. The ability to conduct these robust data linkages is an important methodological innovation that overcomes biases associated with self-reported outcomes and loss to follow-up in previous studies.

The results of this trial will need to be considered in light of some caveats. Although Good Samaritan laws are present in many jurisdictions across the US, including Rhode Island, to protect individuals from criminal

1  
2  
3 prosecutions (42), many people do not call emergency medical services in the event of an overdose (43). It  
4 is possible that the intervention may increase participants' self-efficacy and willingness to engage with  
5 emergency medical services in the event of an overdose. As a result, those receiving the peer recovery  
6 intervention might be more likely to present to the ED in the event of an overdose. Should the intervention  
7 reduce the overall rate of non-fatal overdose but increase the proportion of non-fatal overdoses that are  
8 treated in the ED, the findings related to the impact of the intervention on recurrent ED visits may be null  
9 or counterintuitive. Although the administrative databases used to characterize the primary outcomes are  
10 meant to be representative, they are by no means comprehensive. Individuals who enroll in SUD treatment  
11 programs or who present to EDs in other states will not be captured in these resources. To address these  
12 limitations, we will conduct follow-up surveys to capture treatment enrollment and experiences of opioid  
13 overdose via phone interviews.  
14  
15  
16  
17  
18  
19  
20  
21

22 This trial represents the first systematic evaluation of behavioral interventions delivered by certified peer  
23 recovery support specialists in the ED to individuals at high risk for opioid overdose. Should the trial be  
24 successful, its findings have the potential to establish the evidence base for peer recovery support services  
25 as an effective intervention and provide support for the large-scale implementation of these services in EDs.  
26 Amidst a national crisis, peer recovery support interventions could be an effective means for improving  
27 SUD treatment engagement and reducing rates of fatal and non-fatal overdose.  
28  
29  
30  
31  
32  
33  
34  
35  
36  
37  
38  
39  
40  
41  
42  
43  
44  
45  
46  
47  
48  
49  
50  
51  
52  
53  
54  
55  
56  
57  
58  
59  
60

## References

1. Rudd RA, Seth P, David F, Scholl L. Increases in drug and opioid-involved overdose deaths - United States, 2010–2015. *MMWR Morb Mortal Wkly Rep.* 2016;65(50–51):1445–52.
2. Rudd RA, Aleshire N, Zibbell JE, Gladden RM. Increases in drug and opioid overdose deaths - United States, 2000–2014. *MMWR Morb Mortal Wkly Rep.* 2016;64(50–51):1378–82.
3. Scholl L, Seth P, Kariisa M, Wilson N, Baldwin G. Drug and opioid-involved overdose deaths - United States, 2013–2017. *MMWR Morb Mortal Wkly Rep.* 2018;67(5152):1419–27.
4. Seth P, Scholl L, Rudd RA, Bacon S. Overdose deaths involving opioids, cocaine, and psychostimulants - United States, 2015–2016. *MMWR Morb Mortal Wkly Rep.* 2018;67(12):349–58.
5. Chen Q, Larochelle MR, Weaver DT, Lietz AP, Mueller PP, Mercaldo S, et al. Prevention of prescription opioid misuse and project overdose deaths in the United States. *JAMA Netw Open.* 2019;2(2):e187621.
6. Kiang MV, Basu S, Chen J, Alexander MJ. Assessment of changes in the geographical distribution of opioid-related mortality across the United States by opioid type, 1999–2016. *JAMA Netw Open.* 2019;2(2):e190040.
7. Springer YP, Gladden RM, O’Donnell J, Seth P. Fentanyl drug submissions – United States, 2010–2017. *MMWR Morb Mortal Wkly Rep.* 2019;68(2):41–2.
8. Mercado-Crespo MC, Sumner SA, Spelke MB, Sugerman DE, Stanley C. Increase in fentanyl-related overdose deaths - Rhode Island, November 2013–March 2014. *MMWR Morb Mortal Wkly Rep.* 2014;63(24):531.
9. Somerville NJ, O’Donnell J, Gladden RM, Zibbell JE, Green TC, Younkin M, et al. Characteristics of fentanyl overdose - Massachusetts, 2014–2016. *MMWR Morb Mortal Wkly Rep.* 2017;66(14):383–6.
10. Tommassoni AJ, Hawk KF, Jubanyik K, Noguee DP, Durant T, Lynch KL, et al. Multiple fentanyl overdoses - New Haven, Connecticut, June 23, 2016. *MMWR Morb Mortal Wkly Rep.* 2017;66(4):107–11.
11. Weiss AJ, Elixhauser A, Barrett ML, Steiner CA, Bailey MK, O’Malley L. Opioid-related inpatient stays and emergency department visits by state, 2009–2014. Rockville, Maryland: Agency for Healthcare Research and Quality; 2016.
12. Hasegawa K, Espinola JA, Brown DFM, Camargo CA. Trends in U.S. emergency department visits for opioid overdose, 1993–2010. *Pain Med.* 2014;15(10):1765–70.
13. Mazer-Amirshahi M, Sun C, Mullins P, Perrone J, Nelson L, Pines JM. Trends in emergency department resource utilization for poisoning-related visits, 2003–2011. *J Med Toxicol.* 2016;12(3):248–54.

14. Yokell MA, Delgado MK, Zaller ND, Wang NE, McGowan SK, Green TC. Presentation of prescription and nonprescription opioid overdoses to US emergency departments. *JAMA Intern Med.* 2014;174(12):2034–47.
15. Vivolo-Kantor AM, Seth P, Gladden RM, Mattison CL, Baldwin GT, Kite-Powell A, et al. Trends in emergency department visits for suspected opioid overdoses - United States, July 2016 to September 2017. *MMWR Morb Mortal Wkly Rep.* 2018;67(9):279–85.
16. Brady JE, DiMaggio CJ, Keyes KM, Doyle JJ, Richardson LD, Li G. Emergency department utilization and subsequent prescription drug overdose death. *Ann Epidemiol.* 2015;25(8):613-9.
17. Pavarin RM, Berardi D, Gambini D. Emergency department presentation and mortality due to overdose: A retrospective cohort study on nonfatal overdoses. *Subst Abus.* 2016;37(4):558-63.
18. Daly ER, Dufault K, Swenson DJ, Lakevicius P, Metcalf E, Chan BP. Use of emergency department data to monitor and respond to an increase in opioid overdose in New Hampshire, 2011-2015. *Public Health Rep.* 2017;132(S1):S73-S9.
19. Banta-Green CJ, Coffin PO, Merrill JO, Sears JM, Dunn C, Floyd AS, et al. Impacts of an opioid overdose prevention intervention delivered subsequent to acute care. *Inj Prev.* 2018; Available online ahead of print.
20. Ramchand R, Ahluwalia SC, Xenakis L, Apaydin E, Raaen L, Grimm G. A systematic review of peer-supported interventions for health promotion and disease prevention. *Prev Med.* 2017;101:156-70.
21. Eddie D, Hoffman L, Vilsaint CL, Abry A, Bergman BG, Hoepfner B, et al. Lived experience in new models of care for substance use disorder: A systematic review of peer recovery support services and recovery coaching. *Front Psychol.* 2019;10:1052.
22. Waye KM, Goyer J, Dettor D, Mahoney L, Samuels EA, Yedinak JL, et al. Implementing peer recovery services for overdose prevention in Rhode Island: An examination of two outreach-based approaches. *Addict Behav.* 2019;89:85-91.
23. Luthra S. States see peer-recovery coaches as a way to break the addiction epidemic [Web]. San Francisco, California: Kaiser Health News; 2016 [Available from: <https://khn.org/news/states-see-peer-recovery-coaches-as-a-way-to-break-the-addiction-epidemic/>].
24. United States Department of Health and Human Services. 2-year Restricted Use Data Analysis System (2016-2017) [Internet]. Rockville, Maryland: Substance Abuse and Mental Health Services Administration; 2018 [Available from: <https://rdas.samhsa.gov/#/survey/NSDUH-2016-2017-RD02YR>].
25. Centers for Disease Control and Prevention. Multiple Cause of Death, 1999-2017 [Internet]. Hyattsville, Maryland: National Center for Health Statistics; 2019 [Available from: <https://wonder.cdc.gov/mcd-icd10.html>].

- 1
- 2
- 3 26. State of Rhode Island. Reporting Requirements - RI BHOLD [Internet]. Providence, Rhode Island:
- 4 Department of Behavioral Healthcare, Developmental Disabilities, and Hospitals; 2019 [Available
- 5 from: <http://www.bhddh.ri.gov/sections/reporting.php>.
- 6
- 7
- 8 27. State of Rhode Island. Prescription Drug Monitoring Program [Internet]. Providence, Rhode Island:
- 9 Department of Health; 2019 [Available from:
- 10 <http://health.ri.gov/healthcare/medicine/about/prescriptiondrugmonitoringprogram/>.
- 11
- 12
- 13 28. Adams LL. The role of health information technology in improving quality and safety in RI: Can new
- 14 money solve old problems? *R I Med J*. 2009;98(8):267-8.
- 15
- 16 29. Rowe C, Vittinghoff E, Santos G-M, Behar E, Turner C, Coffin PO. Performance measures of
- 17 diagnostic codes for detecting opioid overdose in the emergency department. *Acad Emerg Med*.
- 18 2017;24(4):475-83.
- 19
- 20 30. Ellison J, Walley AY, Feldman JA, Bernstein E, Mitchell PM, Koppelman EA, et al. Identifying
- 21 patients for overdose prevention with ICD-9 classification in the emergency department,
- 22 Massachusetts, 2013-2014. *Public Health Rep*. 2016;131(5):671-5.
- 23
- 24 31. McCormick M, Koziol JA, Sanchez K. Development and use of a new opioid overdose surveillance
- 25 system, 2016. *R I Med J*. 2017;100(4):37-9.
- 26
- 27 32. Samuels EA, Bernstein SL, Marshall BDL, Krieger M, Baird JR, Mello MJ. Peer navigation and take-
- 28 home naloxone for opioid overdose emergency department patients: Preliminary patient outcomes. *J*
- 29 *Subst Abuse Treat*. 2018;94:29-34.
- 30
- 31 33. Vilsaint CL, Kelly JF, Bergman BG, Groshkova T, Best D, White W. Development and validation of
- 32 a Brief Assessment of Recovery Capital (BARC-10) for alcohol and drug use disorder. *Drug Alcohol*
- 33 *Depend*. 2017;177:71-6.
- 34
- 35 34. De Leon G, Jainchill N. Circumstances, motivation, readiness, and suitability as correlates of treatment
- 36 tenure. *J Psychoactive Drugs*. 1986;18(3):203-8.
- 37
- 38 35. Kayman DJ, Goldstein MF, Deren S, Rosenblum A. Predicting treatment retention with a brief
- 39 "Opinions about Methadone" scale. *J Psychoactive Drugs*. 2006;38(1):93-100.
- 40
- 41 36. Luoma JB, O'Hair AK, Kohlenberg BS, Hayes SC, Fletcher L. The development and psychometric
- 42 properties of a new measure of perceived stigma toward substance users. *Subst Use Misuse*.
- 43 2010;45(1-2):47-57.
- 44
- 45 37. Keller S, Bann CM, Dodd SL, Schein J, Mendoza TR, Cleeland CS. Validity of the Brief Pain
- 46 Inventory for use in documenting the outcomes of patients with non-cancer pain. *Clin J Pain*.
- 47 2004;20(5):309-18.
- 48
- 49 38. Gossop M. The development of a short opiate withdrawal scale (SOWS). *Addict Behav*.
- 50 1990;15(5):487-90.
- 51
- 52
- 53
- 54
- 55
- 56
- 57
- 58
- 59
- 60

- 1  
2  
3 39. Radloff LS. The CES-D Scale: A self-report depression scale for research in the general population.  
4 Appl Psychol Meas. 1977;1(3):385-401.  
5  
6 40. State of Rhode Island. Rhode Island's Strategic Plan on Addiction and Overdose: Four Strategies to  
7 Alter the Course of an Epidemic. Providence, Rhode Island: Governor's Overdose Prevention and  
8 Intervention Task Force; 2015.  
9  
10 41. Marshall BDL, Yedinak JL, Goyer J, Green TC, Koziol JA, Alexander-Scott N. Development of a  
11 statewide, publicly accessible drug overdose surveillance and information system. Am J Public Health.  
12 2017;107(11):1760-3.  
13  
14 42. McClellan C, Lambdin BH, Ali MM, Mutter R, Davis CS, Wheeler E, et al. Opioid-overdose laws  
15 association with opioid use and overdose mortality. Addict Behav. 2018;86:90-5.  
16  
17 43. Koester S, Mueller SR, Raville L, Langedger S, Binswanger IA. Why are some people who have  
18 received overdose education and naloxone reticent to call emergency medical services in the event of  
19 overdose? Int J Drug Policy. 2017;48:115-24.  
20  
21  
22  
23  
24  
25  
26  
27  
28  
29  
30  
31  
32  
33  
34  
35  
36  
37  
38  
39  
40  
41  
42  
43  
44  
45  
46  
47  
48  
49  
50  
51  
52  
53  
54  
55  
56  
57  
58  
59  
60

**Authors' Contributions:**

WCG led the manuscript preparation. The research was conceived by FLB and BDLM. All authors provided feedback on several drafts of the study protocol and this manuscript. WCG, BDLM, EAS, MGB, DD, KJL, LM, RCM, TN, GAO, SER, JLY, and FLB read and approved of the final manuscript.

**Funding Statement:**

This research is funded by a grant from the Laura and John Arnold Foundation (Principal Investigators: Francesca L. Beaudoin, MD, PhD and Brandon D.L. Marshall, PhD) with support from the Center for Biomedical Research Excellence (COBRE) on Opioids and Overdose at Rhode Island Hospital (funded by the National Institute of General Medical Sciences, Award: P20GM125507; Principal Investigator: Josiah D. Rich, MD). In addition, Mr. Goedel is supported by the Brown University Clinical and Community-Based HIV Research Training Fellowship (funded by the National Institute of Mental Health, Award: R25MH083620; Principal Investigator: Amy S. Nunn, ScD).

**Declarations of Competing Interest:**

The authors declare no competing interests.

**Word Count:** 3,912 words



1  
2  
3 **Figure 1. Intervention arms in a randomized clinical trial of an emergency department-based peer**  
4 **recovery support intervention to increase treatment uptake and reduce recurrent overdose among**  
5 **individuals at high risk for opioid overdose**  
6  
7  
8  
9  
10  
11  
12  
13  
14  
15  
16  
17  
18  
19  
20  
21  
22  
23  
24  
25  
26  
27  
28  
29  
30  
31  
32  
33  
34  
35  
36  
37  
38  
39  
40  
41  
42  
43  
44  
45  
46  
47  
48  
49  
50  
51  
52  
53  
54  
55  
56  
57  
58  
59  
60

For peer review only

| Certified Peer Recovery Specialist |                                                                                                                                                                                                                                                                | Licensed Clinical Social Worker |                                                                                                                                                                                                                     |
|------------------------------------|----------------------------------------------------------------------------------------------------------------------------------------------------------------------------------------------------------------------------------------------------------------|---------------------------------|---------------------------------------------------------------------------------------------------------------------------------------------------------------------------------------------------------------------|
| 1                                  | <u>Enrollment Visit in Emergency Department</u> <ul style="list-style-type: none"> <li>Intervention based on motivational interviewing plus lived experience of peer recovery specialist</li> <li>Navigate barriers to treatment, provide referrals</li> </ul> | 1                               | <u>Brief Intervention in Emergency Department</u> <ul style="list-style-type: none"> <li>Intervention based on motivational interviewing plus other clinical skills</li> <li>Provide referrals as needed</li> </ul> |
| 2                                  | <u>Community-Based Follow-Up Visit (&lt;48 hours)</u> <ul style="list-style-type: none"> <li>Navigate barriers to treatment and recovery</li> <li>Ongoing peer support</li> <li>Ongoing overdose prevention education</li> </ul>                               |                                 |                                                                                                                                                                                                                     |
| 3                                  | <u>Retention in Peer Recovery Support (≥90 days)</u> <ul style="list-style-type: none"> <li>Promote retention in treatment</li> <li>Ongoing peer support</li> <li>Ongoing overdose prevention education</li> </ul>                                             |                                 |                                                                                                                                                                                                                     |

Figure 1

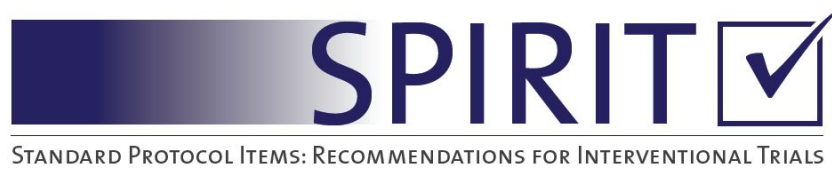

SPIRIT 2013 Checklist: Recommended items to address in a clinical trial protocol and related documents\*

| Section/item                                              | Item No | Page           |
|-----------------------------------------------------------|---------|----------------|
| <b>Administrative information</b>                         |         |                |
| Title                                                     | 1       | Page 1         |
| Trial registration                                        | 2a      | Page 2         |
|                                                           | 2b      | Not Applicable |
| Protocol version                                          | 3       | Not Applicable |
| Funding                                                   | 4       | Page 18        |
| Roles and responsibilities                                | 5a      | Page 1         |
|                                                           | 5b      | Page 1         |
|                                                           | 5c      | Not Applicable |
|                                                           | 5d      | Not Applicable |
| <b>Introduction</b>                                       |         |                |
| Background and rationale                                  | 6a      | Page 3-4       |
|                                                           | 6b      | Page 5         |
| Objectives                                                | 7       | Page 4         |
| Trial design                                              | 8       | Page 4         |
| <b>Methods: Participants, interventions, and outcomes</b> |         |                |
| Study setting                                             | 9       | Page 5         |
| Eligibility criteria                                      | 10      | Page           |
| Interventions                                             | 11a     | Page 5-6       |
|                                                           | 11b     | Not Applicable |
|                                                           | 11c     | Not Applicable |
|                                                           | 11d     | Not Applicable |
| Outcomes                                                  | 12      | Page 7         |

|                         |    |              |
|-------------------------|----|--------------|
| Participant<br>timeline | 13 | Page 5-6, 10 |
| Sample size             | 14 | Page 9       |
| Recruitment             | 15 | Page 9       |

### **Methods: Assignment of interventions (for controlled trials)**

#### Allocation:

|                                        |     |                |
|----------------------------------------|-----|----------------|
| Sequence<br>generation                 | 16a | Page 9         |
| Allocation<br>concealment<br>mechanism | 16b | Page 9         |
| Implementation                         | 16c | Page 9         |
| Blinding<br>(masking)                  | 17a | Page 10        |
|                                        | 17b | Not Applicable |

### **Methods: Data collection, management, and analysis**

|                            |     |                |
|----------------------------|-----|----------------|
| Data collection<br>methods | 18a | Page 10        |
|                            | 18b | Not Applicable |
| Data<br>management         | 19  | Page 10        |
| Statistical<br>methods     | 20a | Page 10        |
|                            | 20b | Page 10        |
|                            | 20c | Not Applicable |

### **Methods: Monitoring**

|                 |     |                |
|-----------------|-----|----------------|
| Data monitoring | 21a | Page 11        |
|                 | 21b | Not Applicable |
| Harms           | 22  | Page 11        |
| Auditing        | 23  | Not Applicable |

### **Ethics and dissemination**

|                             |    |         |
|-----------------------------|----|---------|
| Research ethics<br>approval | 24 | Page 11 |
|-----------------------------|----|---------|

|    |                   |     |                |
|----|-------------------|-----|----------------|
| 1  |                   |     |                |
| 2  | Protocol          | 25  | Page 11        |
| 3  | amendments        |     |                |
| 4  |                   |     |                |
| 5  | Consent or assent | 26a | Page 11        |
| 6  |                   |     |                |
| 7  |                   | 26b | Not Applicable |
| 8  |                   |     |                |
| 9  | Confidentiality   | 27  | Page 11        |
| 10 |                   |     |                |
| 11 | Declaration of    | 28  | Not Applicable |
| 12 | interests         |     |                |
| 13 |                   |     |                |
| 14 | Access to data    | 29  | Page 12        |
| 15 |                   |     |                |
| 16 | Ancillary and     | 30  | Not Applicable |
| 17 | post-trial care   |     |                |
| 18 |                   |     |                |
| 19 | Dissemination     | 31a | Page 12        |
| 20 | policy            |     |                |
| 21 |                   |     |                |
| 22 |                   | 31b | Not Applicable |
| 23 |                   |     |                |
| 24 |                   | 31c | Not Applicable |
| 25 |                   |     |                |
| 26 |                   |     |                |
| 27 | <b>Appendices</b> |     |                |
| 28 |                   |     |                |
| 29 | Informed consent  | 32  | Not Applicable |
| 30 | materials         |     |                |
| 31 |                   |     |                |
| 32 | Biological        | 33  | Not Applicable |
| 33 | specimens         |     |                |

---

\*It is strongly recommended that this checklist be read in conjunction with the SPIRIT 2013 Explanation & Elaboration for important clarification on the items. Amendments to the protocol should be tracked and dated. The SPIRIT checklist is copyrighted by the SPIRIT Group under the Creative Commons "[Attribution-NonCommercial-NoDerivs 3.0 Unported](https://creativecommons.org/licenses/by-nc-nd/3.0/)" license.

# BMJ Open

## A Randomized Clinical Trial of an Emergency Department-Based Peer Recovery Support Intervention to Increase Treatment Uptake and Reduce Recurrent Overdose among Individuals at High Risk for Opioid Overdose: Study Protocol for the Navigator Trial

|                                 |                                                                                                                                                                                                                                                                                                                                                                                                                                                                                                                                                                                                                                                                                                                                                                                                                                                                                                                                                                                                                                                                                                                                                                                                                                                                                                                                                                                                                           |
|---------------------------------|---------------------------------------------------------------------------------------------------------------------------------------------------------------------------------------------------------------------------------------------------------------------------------------------------------------------------------------------------------------------------------------------------------------------------------------------------------------------------------------------------------------------------------------------------------------------------------------------------------------------------------------------------------------------------------------------------------------------------------------------------------------------------------------------------------------------------------------------------------------------------------------------------------------------------------------------------------------------------------------------------------------------------------------------------------------------------------------------------------------------------------------------------------------------------------------------------------------------------------------------------------------------------------------------------------------------------------------------------------------------------------------------------------------------------|
| Journal:                        | <i>BMJ Open</i>                                                                                                                                                                                                                                                                                                                                                                                                                                                                                                                                                                                                                                                                                                                                                                                                                                                                                                                                                                                                                                                                                                                                                                                                                                                                                                                                                                                                           |
| Manuscript ID                   | bmjopen-2019-032052.R2                                                                                                                                                                                                                                                                                                                                                                                                                                                                                                                                                                                                                                                                                                                                                                                                                                                                                                                                                                                                                                                                                                                                                                                                                                                                                                                                                                                                    |
| Article Type:                   | Protocol                                                                                                                                                                                                                                                                                                                                                                                                                                                                                                                                                                                                                                                                                                                                                                                                                                                                                                                                                                                                                                                                                                                                                                                                                                                                                                                                                                                                                  |
| Date Submitted by the Author:   | 30-Sep-2019                                                                                                                                                                                                                                                                                                                                                                                                                                                                                                                                                                                                                                                                                                                                                                                                                                                                                                                                                                                                                                                                                                                                                                                                                                                                                                                                                                                                               |
| Complete List of Authors:       | Goedel, William; Brown University School of Public Health, Department of Epidemiology<br>Marshall, Brandon; Brown University, Department of Epidemiology<br>Samuels, Elizabeth; Brown University Warren Alpert Medical School, Department of Emergency Medicine<br>Brinkman, Mark; Rhode Island Hospital, Department of Emergency Medicine<br>Dettor, Debra; Anchor Recovery Community Center<br>Langdon, Kirsten; Brown University Warren Alpert Medical School, Department of Psychiatry and Human Behavior<br>Mahoney, Linda; Rhode Island Department of Behavioral Healthcare Developmental Disabilities and Hospitals<br>Merchant, Roland; Brown University School of Public Health, Department of Epidemiology; Brown University Warren Alpert Medical School, Department of Emergency Medicine<br>Nizami, Tarek; Rhode Island Hospital, Department of Emergency Medicine<br>O'Toole, George; Anchor Recovery Community Center<br>Ramsey, Susan; Brown University Warren Alpert Medical School, Department of Psychiatry and Human Behavior; Brown University Warren Alpert Medical School, Department of Medicine<br>Yedinak, Jesse; Brown University School of Public Health, Department of Epidemiology<br>Beaudoin, Francesca L; Brown University Warren Alpert Medical School, Department of Emergency Medicine; Brown University School of Public Health, Department of Health Services, Policy, and Practice |
| <b>Primary Subject Heading</b>: | Addiction                                                                                                                                                                                                                                                                                                                                                                                                                                                                                                                                                                                                                                                                                                                                                                                                                                                                                                                                                                                                                                                                                                                                                                                                                                                                                                                                                                                                                 |
| Secondary Subject Heading:      | Emergency medicine, Public health, Patient-centred medicine, Evidence based practice                                                                                                                                                                                                                                                                                                                                                                                                                                                                                                                                                                                                                                                                                                                                                                                                                                                                                                                                                                                                                                                                                                                                                                                                                                                                                                                                      |
| Keywords:                       | ACCIDENT & EMERGENCY MEDICINE, PUBLIC HEALTH, Substance misuse < PSYCHIATRY                                                                                                                                                                                                                                                                                                                                                                                                                                                                                                                                                                                                                                                                                                                                                                                                                                                                                                                                                                                                                                                                                                                                                                                                                                                                                                                                               |
|                                 |                                                                                                                                                                                                                                                                                                                                                                                                                                                                                                                                                                                                                                                                                                                                                                                                                                                                                                                                                                                                                                                                                                                                                                                                                                                                                                                                                                                                                           |

1  
2  
3  
4  
5  
6  
7  
8  
9  
10  
11  
12  
13  
14  
15  
16  
17  
18  
19  
20  
21  
22  
23  
24  
25  
26  
27  
28  
29  
30  
31  
32  
33  
34  
35  
36  
37  
38  
39  
40  
41  
42  
43  
44  
45  
46  
47  
48  
49  
50  
51  
52  
53  
54  
55  
56  
57  
58  
59  
60



1  
2  
3 **A Randomized Clinical Trial of an Emergency Department-Based Peer Recovery Support**  
4 **Intervention to Increase Treatment Uptake and Reduce Recurrent Overdose among Individuals at**  
5 **High Risk for Opioid Overdose: Study Protocol for the Navigator Trial**  
6  
7  
8

9 William C. Goedel, BA<sup>1</sup>

10 Brandon D.L. Marshall, PhD<sup>1</sup>

11 Elizabeth A. Samuels, MD, MPH<sup>2</sup>

12 Mark G. Brinkman, BS<sup>3</sup>

13 Debra Dettor, MS, CPRS<sup>4</sup>

14 Kirsten J. Langdon, PhD<sup>5</sup>

15 Linda Mahoney, CAADC, CCS<sup>6</sup>

16 Roland C. Merchant, MD, ScD, MPH<sup>1,2</sup>

17 Tarek Nizami, MD<sup>3</sup>

18 George A. O'Toole, BS, CPRS<sup>4</sup>

19 Susan E. Ramsey, PhD<sup>5,7</sup>

20 Jesse L. Yedinak, MPA<sup>1</sup>

21 Francesca L. Beaudoin, MD, PhD<sup>2,8</sup>

22  
23  
24  
25  
26  
27  
28  
29  
30  
31 1. Department of Epidemiology, School of Public Health, Brown University, Providence, RI

32 2. Department of Emergency Medicine, Warren Alpert Medical School, Brown University, Providence, RI

33 3. Department of Emergency Medicine, Rhode Island Hospital, Providence, RI

34 4. Anchor Recovery Community Center, Pawtucket, RI

35 5. Department of Psychiatry and Human Behavior, Warren Alpert Medical School, Brown University, Providence, RI

36 6. Rhode Island Department of Behavioral Healthcare, Developmental Disabilities, and Health, Cranston, RI

37 7. Department of Medicine, Warren Alpert Medical School, Brown University, Providence, RI

38 8. Department of Health Services, Policy, and Practice, School of Public Health, Brown University, Providence, RI

39  
40  
41  
42  
43  
44 **Address Correspondence to:**

45 Francesca L. Beaudoin, MD, PhD; Brown University Alpert Medical School Department of Emergency  
46 Medicine; 55 Claverick Street, 2nd Floor, Providence, Rhode Island, United States, 02903. E-mail Address:  
47 francesca\_beaudoin@brown.edu. Phone Number: (401) 444-5411. Fax Number: (401) 444-4307.  
48  
49  
50  
51  
52  
53  
54  
55  
56  
57  
58  
59  
60



## ABSTRACT

**Introduction:** Effective approaches to increase engagement in treatment for opioid use disorder (OUD) and reduce the risk of recurrent overdose and death following emergency department (ED) presentation for opioid overdose remain unknown. As such, we aim to compare the effectiveness of behavioral interventions delivered in the ED by certified peer recovery support specialists relative to those delivered by licensed clinical social workers (LCSWs) in promoting OUD treatment uptake and reducing recurrent ED visits for opioid overdose.

**Methods and Analysis:** Adult ED patients who are at high risk for opioid overdose (i.e., are being treated for an opioid overdose or identified by the treating physician as having OUD) ( $n = 650$ ) will be recruited from two emergency departments in a single health care system in Providence, Rhode Island into a two-arm randomized trial with 18 months of follow-up post-randomization. Eligible participants will be randomly assigned (1:1) in the ED to receive a behavioral intervention from a certified peer recovery support specialist or a behavioral intervention from an LCSW. The primary outcomes are engagement in formal OUD treatment within 30 days of the initial ED visit and recurrent ED visits for opioid overdose within 18 months of the initial ED visit, as measured through statewide administrative records.

**Ethics and Dissemination:** This protocol was approved by the Rhode Island Hospital institutional review board (Approval Number: 212418). Data will be presented at national and international conferences and published in peer-reviewed journals.

**Trial Registration:** NCT03684681 (ClinicalTrials.gov)

## KEYWORDS

Opioid Overdose; Emergency Department; Peer Support; Recovery; Randomized Trial

### STRENGTHS AND LIMITATIONS

- This study represents the first randomized controlled trial to assess the impact of a peer recovery support intervention on uptake of OUD treatment and recurrent ED presentation for opioid-involved overdose.
- This study leverages a statewide comprehensive data sharing infrastructure to use administrative records to characterize the primary outcomes (e.g., OUD treatment enrollment, recurrent ED presentation), thus overcoming biases associated with self-reported outcomes and loss to follow-up in previous studies.
- Although the administrative databases used to characterize the primary outcomes are meant to be representative, they are by no means comprehensive (i.e., individuals who enroll in OUD treatment programs or who present to EDs in other states will not be captured in these resources).

## INTRODUCTION

### Background and Rationale

Deaths attributable to accidental drug overdose, particularly those involving opioids, have reached epidemic levels in the United States (US) (1-4). In the past two decades, US overdose mortality rates have more than doubled, from 6.2 per 100,000 persons in 2000 to 21.7 per 100,000 persons in 2017 (2, 3). There have been 700,000 opioid overdose deaths between 2000 to 2015 in the US (5), and the crisis is expected to worsen under current trends (6). Since 2013, the opioid overdose epidemic has been marked by significant increases in deaths involving powerful synthetic opioids (e.g., fentanyl) (3). The burden of the drug overdose epidemic is greatly elevated in New England, where fentanyl has been present in the illicit drug supply since as early as 2012 (7-10). Rhode Island has one of the highest drug overdose rates in the nation (3), and in 2014 reported the third and fourth highest rate of opioid-related emergency department (ED) visits and inpatient hospital stays, respectively (11).

In addition to increases in fatal opioid overdoses, EDs have had substantial increases in visits for non-fatal opioid overdoses (12-14). About 120,000 ED visits were reported for suspected non-fatal opioid overdoses between July 2016 and September 2017 in sixteen states participating in the Enhanced State Opioid Overdose Surveillance, representing a 35% increase over this period (15). As such, the ED serves as a critical intervention site for providing services to people at high risk of opioid overdose and those with opioid use disorder (OUD). In the year after presenting to the ED for a drug overdose, a person is at heightened risk for death (16, 17). In a nested case-control study in New York, the odds of death due to prescription drug overdose were 4.9 times higher for those with two ED visits, 16.6 times higher for those with three ED visits, and 48.2 times higher for those with four or more visits relative to one ED visit or less in the year preceding death (16). Thus, the ED is both a critical and timely place for intervention and the reason for the ED visit itself (i.e., overdose) can be used as an opportunity to identify patients at highest risk of fatal drug overdose and deliver interventions (18).

The most effective means to promote engagement in substance use disorder (SUD) treatment and reduce the risk of recurrent overdose and death following presentation to an ED for opioid overdose remains unknown. One of the only randomized studies of overdose education combined with a brief motivational interviewing-based intervention delivered in the ED by licensed mental health counselors resulted in reductions in overdose risk behaviors among individuals presenting to the ED and reporting non-medical prescription opioid use (Bohnert et al., 2016). However, a trial deploying a similar intervention did not reduce overdose rates or prevent subsequent ED visits or hospitalizations compared to usual care (19). It is possible, however, that these types of interventions may be more effective if delivered by people with lived

1  
2  
3 experiences with SUD and recovery. Peer-based interventions are an effective component of care across  
4 non-clinical settings and in other aspects of health care for other conditions (20). A recent systematic review  
5 by Ramchand and colleagues (2017) found that group-based interventions that use peers as educators  
6 commonly improve knowledge, attitudes, beliefs, and perceptions and improve connectedness and  
7 engagement with health promotion activities (20). Further, a recent systematic review of peer recovery  
8 support services in care for substance use disorder found that existing randomized controlled trials have  
9 been subject to several limitations, particularly poorly defined and non-manualized roles for peers, and, as  
10 such, there remains a need for more rigorous evaluation to determine the efficacy, effectiveness, and cost-  
11 effectiveness of peer recovery support services (21). However, little is known about their effectiveness in  
12 improving outcomes for persons at high risk for opioid overdose. In response to Rhode Island's overdose  
13 crisis, individuals in long-term recovery with specialized training in SUD management, known as certified  
14 peer recovery support specialists, have been deployed in EDs since 2014 (22). The goal of their work is to  
15 help patients navigate obstacles to recovery through problem-solving, goal setting, avoiding relapse  
16 triggers, and planning and obtaining services. Despite the promise of and significant national interest in this  
17 approach (23), no studies have rigorously evaluated whether peer-based behavioral interventions delivered  
18 in the ED result in improved outcomes for patients at high risk of opioid overdose.  
19  
20  
21  
22  
23  
24  
25  
26  
27  
28  
29

### 30 **Objectives**

31 We aim to test the effectiveness of behavioral interventions delivered in the ED by certified peer recovery  
32 support specialists in improving outcomes for patients at high risk of opioid overdose relative to those  
33 delivered by licensed clinical social workers (LCSWs). We hypothesize that, because certified peer  
34 recovery support specialists are able to draw from their own lived experiences with SUD and recovery,  
35 patients who are randomly assigned to receive a behavioral intervention from a peer recovery support  
36 specialist, as compared to receiving an intervention from an LCSW, will be: (1) more likely to engage in  
37 formal SUD treatment within 30 days following the initial visit, and (2) less likely to experience a recurrent  
38 ED visit for an opioid overdose during the succeeding 18 months.  
39  
40  
41  
42  
43  
44  
45

### 46 **Trial Design**

47 The trial utilizes a parallel design where patients at high risk for opioid overdose who present to the ED are  
48 randomly assigned 1:1 to receive a behavioral intervention from a certified peer recovery support specialist  
49 or an LCSW.  
50  
51  
52  
53  
54  
55  
56  
57  
58  
59  
60

## **METHODS: PARTICIPANTS, INTERVENTIONS, OUTCOMES**

### **Study Setting**

Rhode Island is home to over one million residents. Since 2000, the state has experienced a high burden of opioid overdose. According to the 2016–2017 cycle of the National Survey on Drug Use and Health, 4.7% of Rhode Islanders used heroin or misused a prescription opioid in the past year (24). Between 2013 and 2017, the age-adjusted rate of death due to opioid overdose increased by 44.2%, from 18.1 to 26.1 per 100,000 persons, with these increases largely driven by synthetic opioids other than methadone (16.8% of opioid overdose deaths in 2013 versus 72.6% in 2017) (25).

### **Eligibility Criteria**

To be eligible, participants must also be in the ED because they are: (1) being treated for an opioid overdose; (2) receiving treatment related to OUD (e.g., infectious complication, withdrawal); or (3) self-report an opioid overdose within the previous 12 months. The presence of an opioid overdose will be determined by the treating physician and is generally defined as (1) the presence of decreased levels of consciousness or respiratory depression and (2) occurring after the consumption of opioids or resolving after the administration of naloxone. Potential participants will be deemed ineligible if they are critically ill or injured, have previously enrolled in the trial, are in police custody or incarcerated, pregnant, or live outside of Rhode Island. Patients who are critically ill or injured will be eligible for screening and enrollment once cleared to participate by their treating physician.

### **Patient and Public Involvement**

No patient involved.

### **Interventions**

#### Current Standard of Care

The current standard of care following an ED visit for an opioid overdose at the study sites is to receive a behavioral intervention delivered by a certified peer recovery support specialist or an LCSW. Whether a patient is evaluated by a social worker or a peer recovery support specialist can depend on the time of day, staff availability, and preferences or views of the provider or patient. In the trial, patients will be randomly assigned to receive a behavioral intervention in the ED delivered by (1) a staff LCSW, or (2) a certified peer recovery support specialist trained by the Anchor Recovery Community Center (Figure 1).

### Behavioral Intervention Delivered by Certified Peer Recovery Support Specialists

The Anchor Recovery Community Center is Rhode Island's first community-based peer recovery center (22). It is designed as an access point for those with SUD, providing services such as job counseling, health and wellness activities, and individualized long-term peer recovery coaching (22). Through one of its outreach programs, known as AnchorED, the Anchor Recovery Community Center has deployed certified peer recovery support specialists to EDs across Rhode Island since 2014 (22). As part of AnchorED, certified peer recovery support specialists arrive in the ED within 30 minutes of consultation, assess individuals for readiness to seek treatment, provide linkage to treatment, and educate patients on overdose prevention and response (22). Peer recovery specialists call every day for ten days in an attempt to make contact following discharge from the ED. Once contact is made, peer recovery specialists and their clients make plans for regular contact and follow-up. There are 30 peer recovery support specialists available to deliver these interventions between the two study sites.

To become a certified peer recovery support specialist, applicants must be in recovery for at least two years, undergo a 45-hour training program at Anchor Recovery Community Center based on the Connecticut Community for Addiction Recovery curriculum, and accrue 500 hours of supervised work experience providing peer recovery support services (22). All peer recovery support specialists obtain certification from the International Certification and Reciprocity Consortium (22). The certification program focuses on advocacy, wellness and recovery, motivational interviewing techniques, mentoring and education, and ethics as well as additional training on the provision of trauma-informed care and the transtheoretical model of behavior change. In addition to employing motivational interviewing techniques, peer recovery support specialists support individuals' self-efficacy and prevent relapse by addressing social, environmental, and personal factors, such as awareness and avoidance of relapse triggers, polysubstance use, stigma associated with SUD and their treatment, knowledge of treatment services (including the use of medications for OUD treatment), and addressing financial and transportation barriers to treatment (22). Certified peer recovery support specialists are uniquely positioned to deliver behavioral interventions to individuals who have experienced overdose as they couple their training with lived experiences of SUD and recovery (22).

### Behavioral Intervention Delivered via Licensed Clinical Social Workers

There are 35 full and part-time LCSW on staff in the Department of Social Work between the two study sites. Staff social workers arrive in the ED within 30 minutes of consultation. Staff social workers are trained and available to deliver interventions to patients presenting with an opioid overdose and/or with OUD in the ED. As LCSWs, these individuals are capable of delivering a variety of interviewing and intervention techniques that are rooted in social work theory and practice models. Social work practice

1  
2  
3 models are strategies that the social worker can incorporate into their interventions to help people meet their  
4 goals (e.g., task-centered practice, cognitive behavioral therapy, crisis intervention model). Although the  
5 intervention delivered by LCSWs and their associated theoretical underpinnings are similar in some  
6 respects to those associated with those delivered by certified peer recovery support specialists, the social  
7 worker intervention is intended to be a single session with referral to SUD treatment.  
8  
9  
10

## 11 **Outcomes**

### 12 Primary Outcomes

13  
14 The two primary outcomes of the trial are (1) engagement with a formal SUD treatment program within 30  
15 days of the initial ED visit, and (2) recurrent ED visit(s) for a suspected opioid overdose over 18 months.  
16 Both endpoints will be assessed via statewide administrative databases as outlined below. All records will  
17 be linked deterministically to participant data using identifiable information in a secure, Health Insurance  
18 Portability and Accountability Act (HIPAA)-compliant computing environment.  
19  
20  
21  
22  
23  
24

25 The first primary outcome of the trial is treatment engagement, defined as admission to a formal, publicly  
26 licensed SUD treatment program within 30 days of the initial ED visit. The Rhode Island Department of  
27 Behavioral Health, Developmental Disabilities, and Hospitals (BHDDH) maintains the Behavioral Health  
28 Online Database (BHOLD), a state database containing information on all admission and discharge events  
29 of clients of all licensed behavioral healthcare organizations in the state (26). BHOLD is a comprehensive  
30 database on all licensed treatment programs, including inpatient detoxification programs, day treatment  
31 programs, residential treatment programs, intensive outpatient programs, and opioid treatment programs  
32 (26). Records in BHOLD include individuals who receive methadone or buprenorphine from a licensed  
33 opioid treatment program. In addition to this data resource, records from the prescription drug monitoring  
34 program (PDMP) maintained by the Rhode Island Department of Health will be used to supplement  
35 BHOLD to identify patients who initiate buprenorphine in office-based settings (27).  
36  
37  
38  
39  
40  
41  
42  
43

44 The second primary outcome of the trial is recurrent visits to the ED for a suspected opioid overdose,  
45 defined as any presentation to an ED in Rhode Island for an opioid overdose within the 18 months following  
46 the initial ED visit at the two sites. The Rhode Island Quality Institute maintains CurrentCare, a health  
47 information exchange that provides a unified data system for EMRs for all major health systems in Rhode  
48 Island, allowing us to identify repeat visits for suspected opioid overdoses at all twelve EDs in the state  
49 (28). Opioid overdoses will be defined according to the Centers for Disease Control and Prevention (CDC)  
50 guidelines for all opioid poisonings and utilize International Classification of Disease (ICD) codes (29, 30).  
51 The Rhode Island Department of Health mandates that all suspected overdoses presenting to a hospital be  
52  
53  
54  
55  
56  
57  
58  
59  
60



1  
2  
3 reported to the department within 48 hours. This data source, referred to as the 48-hour overdose  
4 surveillance system (31), will be used to supplement the EMRs in CurrentCare.  
5  
6  
7

### 8 **Sample Size**

9 Based on preliminary assessments from the study sites, we are assuming that 7% of participants assigned  
10 to receive a behavioral intervention from an LCSW will enroll in a formal SUD treatment program within  
11 30 days of their ED visit. Given this assumption for a sample size of 650 participants, we have at least 80%  
12 power to detect a two-fold increase in treatment engagement among participants assigned to receive a  
13 behavioral intervention from a peer recovery specialist (Effect Size: 0.07; 95% CI: 0.02–0.12). This two-  
14 fold increase was identified by community stakeholders as an appropriate benchmark for this outcome.  
15 Based on a recent medical record review from one of the study sites and estimates from other studies (19,  
16 32), we are assuming that 15% of participants who receive a behavioral intervention from an LCSW will  
17 experience a subsequent repeat ED visit for opioid overdose. Given this assumption and our sample, we  
18 have at least 80% power to detect a 50% relative reduction in the risk of recurrent ED visits for opioid  
19 overdose within 18 months following the initial visit among those assigned to receive a behavioral  
20 intervention from a peer recovery specialist (Effect Size: 0.075; 95% CI: 0.02–0.13).  
21  
22  
23  
24  
25  
26  
27  
28  
29

### 30 **Recruitment**

31 Participants will be recruited from two EDs—Level 1 and Level 2 trauma centers—located in the state’s  
32 capital of Providence. Together, these two EDs receive over 175,000 adult visits each year. Between 2017  
33 and 2018, the two EDs reported a total of 1,446 visits for suspected opioid overdoses, representing 45% of  
34 all ED visits for suspected opioid overdose reported to the Rhode Island Department of Health ( $n = 3,239$ ).  
35 A consecutive sample of ED patients will be assessed for eligibility by one of eleven full-time research  
36 assistants employed in the two EDs who can recruit participants 24 hours per day, seven days per week.  
37 Potential participants will be identified by the research assistants by screening electronic medical records  
38 (EMRs) or by referral from treating providers in the ED. Potential participants will be considered eligible  
39 if they are 18 years of age or older and speak English. Given the specificity of the pool of LCSWs and  
40 certified peer recovery support specialists to the ED, recruitment will occur in the ED only.  
41  
42  
43  
44  
45  
46  
47  
48

## 49 **METHODS: ASSIGNMENT OF INTERENTIONS**

### 50 **Allocation**

51 Participants will be randomly assigned 1:1 within each study site to receive either a behavioral intervention  
52 delivered by a certified peer recovery support specialist or by an LCSW. Allocations will be randomly  
53  
54  
55  
56  
57  
58  
59  
60



1  
2  
3 assigned using the REDCap randomization feature. The randomization schedule will be maintained by a  
4 data manager not involved with participant recruitment or the final study analyses.  
5  
6  
7

### 8 **Blinding (Masking)**

9 Participants and providers cannot be blinded to their intervention assignment. However, research assistants  
10 who are responsible for the follow-up assessments and investigators and analysts performing the study  
11 analyses will be blinded to arm allocation.  
12  
13  
14

## 15 **METHODS: DATA COLLECTION, MANAGEMENT, ANALYSIS**

### 16 **Data Collection Methods**

17 The primary outcomes assessments will rely on the use of administrative data (see below).  
18  
19  
20  
21

### 22 **Data Management**

23 All data collection instruments will be designed using Research Electronic Data Capture (REDCap)  
24 software and administered using a tablet computer connected to the wireless network at the two study sites.  
25 All follow-up assessments will be conducted via telephone by a research assistant, and all responses will  
26 be directly entered into REDCap.  
27  
28  
29  
30

### 31 **Statistical Methods**

32 We will use an intention-to-treat (ITT) approach in all analyses to estimate the average treatment effect.  
33 For the two primary outcomes (engagement in formal SUD treatment within 30 days of the initial ED visit  
34 and occurrence of a subsequent ED visit for opioid overdose within 18 months of the initial ED visit), we  
35 will use separate logistic regression models with indicators for treatment allocation. Analyses with binary  
36 outcomes were selected based on input from community stakeholders. In exploratory analyses, we will use  
37 survival methods (e.g., Cox proportional hazards models) to assess the impact of treatment on the time to  
38 events for both outcomes (i.e., days from discharge to enrollment in formal SUD treatment and days from  
39 discharge to first recurrent ED visit for opioid overdose). In addition, on an exploratory basis, we will  
40 conduct moderation analyses to understand potential heterogeneity of treatment effects by age and gender.  
41 Given the multicenter design of the trial, the effect of treatment site will be quantified by the intraclass  
42 correlation coefficient (ICC), representing the variance due to the between-center variability (33). Should  
43 the ICC suggest that a large portion of the variance is explained by between-center variability, we will  
44 control for treatment site using a generalized estimating equations (GEE) approach to estimate population-  
45 average treatment effects across the two sites.  
46  
47  
48  
49  
50  
51  
52  
53  
54  
55  
56  
57  
58  
59  
60

## **METHODS: MONITORING**

### **Data Monitoring**

A single data safety monitoring board (DSMB) will be convened and include members external to the research team and funding source and without potential conflicts of interest. The DSMB will be notified within 24 hours of any serious adverse event in which the relationship to the study is possible. The DSMB will convene at the earliest possible time (no more than 30 days from time of notification) to discuss this adverse event. Further, the DSMB will meet on a quarterly basis with the study coordinator and co-principal investigators to review protocol adherence and adverse events.

### **Harms**

An adverse event is considered any physical or clinical change experienced by the patient, including the onset of new symptoms or the exacerbation of pre-existing conditions.

## **ETHICS AND DISSEMINATION**

### **Research Ethics Approval**

All protocols have been approved by the institutional review boards at the Lifespan health system representing the two clinical sites (Approval Number: 212418).

### **Protocol Amendments**

Any modifications to the protocol which may impact on the conduct of the study, potential benefit of the patient, or may affect patient safety, including changes of study objectives, study design, patient population, sample sizes, study procedures, or significant administrative aspects will require a formal amendment.

### **Consent**

Training research assistants will introduce and discuss the trial with potential participants. These potential participants will then be able to have an informed discussion with the research assistant about their potential participation. Following this discussion research assistants will obtain written informed consent.

### **Confidentiality**

The privacy of all trial participants is protected by a Certificate of Confidentiality issued by the National Institutes of Health. Unique identification numbers will be assigned to participants. All data forms and interviews will be coded with this number rather than with a name. All paper forms will be stored in locked file cabinets. Informed consent documents will be stored separately, as they contain identifying information. Upon completion of the study, identifying information will be destroyed.

### **Access to Data**

The institutional review boards at the Lifespan health system representing the two clinical sites will have access to anonymized data at their discretion. However, no third-party investigators will have access to study data prior to synthesis and dissemination.

### **Dissemination Policy**

The study has been registered on ClinicalTrials.gov. A summary of the trial's results will be published there when available. Results will be published at national scientific meetings and the final results will be submitted for publication in peer-reviewed journals.

## **DISCUSSION**

The AnchorED program of Anchor Recovery Community Center, which deploys certified peer recovery support specialists to EDs across Rhode Island to deliver behavioral interventions to individuals who have experienced an opioid overdose, is the first statewide program of its kind in the nation (22). Despite a lack of evidence to demonstrate the effectiveness of this program and improved long-term outcomes for patients, several other jurisdictions in the US have created or are initiating programs based on the AnchorED model (23). Given the intense interest in peer recovery models, the results of this trial have a strong potential to fundamentally change clinical practice paradigms for treating patients at high risk for opioid overdose who present to EDs across the nation.

The current study benefits from support from a unique policy environment in Rhode Island. In 2015, Governor Gina Raimondo signed an executive order to establish the Rhode Island Overdose Prevention and Intervention Task Force, which charged experts to develop a strategic plan to guide efforts to tackle the state's overdose crisis (34). An important outcome of this plan was a comprehensive data sharing infrastructure between key state agencies (including the Rhode Island Departments of Health and Behavioral Healthcare, Developmental Disabilities, and Hospitals) and academic researchers (35). These data sharing agreements offer unprecedented access to population-based data on overdose morbidity and mortality (35). As a result, the trial investigators can create a large database linking participant data with multiple administrative databases to ascertain our primary and secondary outcomes. The ability to conduct these robust data linkages is an important methodological innovation that overcomes biases associated with self-reported outcomes and loss to follow-up in previous studies.

1  
2  
3 The results of this trial will need to be considered in light of some caveats. Although Good Samaritan laws  
4 are present in many jurisdictions across the US, including Rhode Island, to protect individuals from criminal  
5 prosecutions (36), many people do not call emergency medical services in the event of an overdose (37). It  
6 is possible that the intervention may increase participants' self-efficacy and willingness to engage with  
7 emergency medical services in the event of an overdose. As a result, those receiving the peer recovery  
8 intervention might be more likely to present to the ED in the event of an overdose. Should the intervention  
9 reduce the overall rate of non-fatal overdose but increase the proportion of non-fatal overdoses that are  
10 treated in the ED, the findings related to the impact of the intervention on recurrent ED visits may be null  
11 or counterintuitive. Although the administrative databases used to characterize the primary outcomes are  
12 meant to be representative, they are by no means comprehensive. Individuals who enroll in SUD treatment  
13 programs or who present to EDs in other states will not be captured in these resources. Given the pragmatic  
14 nature of the trial, fidelity monitoring and process checking are not being conducted, thus limiting potential  
15 understanding of what components of the intervention were performed should they be deemed efficacious.  
16  
17  
18  
19  
20  
21  
22  
23  
24

25 This trial represents the first systematic evaluation of behavioral interventions delivered by certified peer  
26 recovery support specialists in the ED to individuals at high risk for opioid overdose. Should the trial be  
27 successful, its findings have the potential to establish the evidence base for peer recovery support services  
28 as an effective intervention and provide support for the large-scale implementation of these services in EDs.  
29 Amidst a national crisis, peer recovery support interventions could be an effective means for improving  
30 SUD treatment engagement and reducing rates of fatal and non-fatal overdose.  
31  
32  
33  
34  
35  
36  
37  
38  
39  
40  
41  
42  
43  
44  
45  
46  
47  
48  
49  
50  
51  
52  
53  
54  
55  
56  
57  
58  
59  
60

## References

1. Rudd RA, Seth P, David F, Scholl L. Increases in drug and opioid-involved overdose deaths - United States, 2010–2015. *MMWR Morb Mortal Wkly Rep.* 2016;65(50–51):1445–52.
2. Rudd RA, Aleshire N, Zibbell JE, Gladden RM. Increases in drug and opioid overdose deaths - United States, 2000–2014. *MMWR Morb Mortal Wkly Rep.* 2016;64(50–51):1378–82.
3. Scholl L, Seth P, Kariisa M, Wilson N, Baldwin G. Drug and opioid-involved overdose deaths - United States, 2013–2017. *MMWR Morb Mortal Wkly Rep.* 2018;67(5152):1419–27.
4. Seth P, Scholl L, Rudd RA, Bacon S. Overdose deaths involving opioids, cocaine, and psychostimulants - United States, 2015–2016. *MMWR Morb Mortal Wkly Rep.* 2018;67(12):349–58.
5. Chen Q, Larochelle MR, Weaver DT, Lietz AP, Mueller PP, Mercaldo S, et al. Prevention of prescription opioid misuse and project overdose deaths in the United States. *JAMA Netw Open.* 2019;2(2):e187621.
6. Kiang MV, Basu S, Chen J, Alexander MJ. Assessment of changes in the geographical distribution of opioid-related mortality across the United States by opioid type, 1999–2016. *JAMA Netw Open.* 2019;2(2):e190040.
7. Springer YP, Gladden RM, O’Donnell J, Seth P. Fentanyl drug submissions – United States, 2010–2017. *MMWR Morb Mortal Wkly Rep.* 2019;68(2):41–2.
8. Mercado-Crespo MC, Sumner SA, Spelke MB, Sugerman DE, Stanley C. Increase in fentanyl-related overdose deaths - Rhode Island, November 2013–March 2014. *MMWR Morb Mortal Wkly Rep.* 2014;63(24):531.
9. Somerville NJ, O’Donnell J, Gladden RM, Zibbell JE, Green TC, Younkin M, et al. Characteristics of fentanyl overdose - Massachusetts, 2014–2016. *MMWR Morb Mortal Wkly Rep.* 2017;66(14):383–6.
10. Tommassoni AJ, Hawk KF, Jubanyik K, Noguee DP, Durant T, Lynch KL, et al. Multiple fentanyl overdoses - New Haven, Connecticut, June 23, 2016. *MMWR Morb Mortal Wkly Rep.* 2017;66(4):107–11.
11. Weiss AJ, Elixhauser A, Barrett ML, Steiner CA, Bailey MK, O’Malley L. Opioid-related inpatient stays and emergency department visits by state, 2009–2014. Rockville, Maryland: Agency for Healthcare Research and Quality; 2016.
12. Hasegawa K, Espinola JA, Brown DFM, Camargo CA. Trends in U.S. emergency department visits for opioid overdose, 1993–2010. *Pain Med.* 2014;15(10):1765–70.
13. Mazer-Amirshahi M, Sun C, Mullins P, Perrone J, Nelson L, Pines JM. Trends in emergency department resource utilization for poisoning-related visits, 2003–2011. *J Med Toxicol.* 2016;12(3):248–54.

14. Yokell MA, Delgado MK, Zaller ND, Wang NE, McGowan SK, Green TC. Presentation of prescription and nonprescription opioid overdoses to US emergency departments. *JAMA Intern Med.* 2014;174(12):2034–47.
15. Vivolo-Kantor AM, Seth P, Gladden RM, Mattison CL, Baldwin GT, Kite-Powell A, et al. Trends in emergency department visits for suspected opioid overdoses - United States, July 2016 to September 2017. *MMWR Morb Mortal Wkly Rep.* 2018;67(9):279–85.
16. Brady JE, DiMaggio CJ, Keyes KM, Doyle JJ, Richardson LD, Li G. Emergency department utilization and subsequent prescription drug overdose death. *Ann Epidemiol.* 2015;25(8):613-9.
17. Pavarin RM, Berardi D, Gambini D. Emergency department presentation and mortality due to overdose: A retrospective cohort study on nonfatal overdoses. *Subst Abus.* 2016;37(4):558-63.
18. Daly ER, Dufault K, Swenson DJ, Lakevicius P, Metcalf E, Chan BP. Use of emergency department data to monitor and respond to an increase in opioid overdose in New Hampshire, 2011-2015. *Public Health Rep.* 2017;132(S1):S73-S9.
19. Banta-Green CJ, Coffin PO, Merrill JO, Sears JM, Dunn C, Floyd AS, et al. Impacts of an opioid overdose prevention intervention delivered subsequent to acute care. *Inj Prev.* 2019;25(3):191-8.
20. Ramchand R, Ahluwalia SC, Xenakis L, Apaydin E, Raaen L, Grimm G. A systematic review of peer-supported interventions for health promotion and disease prevention. *Prev Med.* 2017;101:156-70.
21. Eddie D, Hoffman L, Vilsaint CL, Abry A, Bergman BG, Hoepfner B, et al. Lived experience in new models of care for substance use disorder: A systematic review of peer recovery support services and recovery coaching. *Front Psychol.* 2019;10:1052.
22. Waye KM, Goyer J, Dettor D, Mahoney L, Samuels EA, Yedinak JL, et al. Implementing peer recovery services for overdose prevention in Rhode Island: An examination of two outreach-based approaches. *Addict Behav.* 2019;89:85-91.
23. Luthra S. States see peer-recovery coaches as a way to break the addiction epidemic [Web]. San Francisco, California: Kaiser Health News; 2016 [Available from: <https://khn.org/news/states-see-peer-recovery-coaches-as-a-way-to-break-the-addiction-epidemic/>].
24. United States Department of Health and Human Services. 2-year Restricted Use Data Analysis System (2016-2017) [Internet]. Rockville, Maryland: Substance Abuse and Mental Health Services Administration; 2018 [Available from: <https://rdas.samhsa.gov/#/survey/NSDUH-2016-2017-RD02YR>].
25. Centers for Disease Control and Prevention. Multiple Cause of Death, 1999-2017 [Internet]. Hyattsville, Maryland: National Center for Health Statistics; 2019 [Available from: <https://wonder.cdc.gov/mcd-icd10.html>].

- 1  
2  
3 26. State of Rhode Island. Reporting Requirements - RI BHOLD [Internet]. Providence, Rhode Island:  
4 Department of Behavioral Healthcare, Developmental Disabilities, and Hospitals; 2019 [Available  
5 from: <http://www.bhddh.ri.gov/sections/reporting.php>.  
6
- 7  
8 27. State of Rhode Island. Prescription Drug Monitoring Program [Internet]. Providence, Rhode Island:  
9 Department of Health; 2019 [Available from:  
10 <http://health.ri.gov/healthcare/medicine/about/prescriptiondrugmonitoringprogram/>.  
11
- 12 28. Adams LL. The role of health information technology in improving quality and safety in RI: Can new  
13 money solve old problems? *R I Med J*. 2009;98(8):267-8.  
14
- 15 29. Rowe C, Vittinghoff E, Santos G-M, Behar E, Turner C, Coffin PO. Performance measures of  
16 diagnostic codes for detecting opioid overdose in the emergency department. *Acad Emerg Med*.  
17 2017;24(4):475-83.  
18
- 19 30. Ellison J, Walley AY, Feldman JA, Bernstein E, Mitchell PM, Koppelman EA, et al. Identifying  
20 patients for overdose prevention with ICD-9 classification in the emergency department,  
21 Massachusetts, 2013-2014. *Public Health Rep*. 2016;131(5):671-5.  
22
- 23 31. McCormick M, Koziol JA, Sanchez K. Development and use of a new opioid overdose surveillance  
24 system, 2016. *R I Med J*. 2017;100(4):37-9.  
25
- 26 32. Samuels EA, Bernstein SL, Marshall BDL, Krieger M, Baird JR, Mello MJ. Peer navigation and take-  
27 home naloxone for opioid overdose emergency department patients: Preliminary patient outcomes. *J*  
28 *Subst Abuse Treat*. 2018;94:29-34.  
29
- 30 33. Moerbeek M, van Breukelen GJ, Berger MP. A comparison between traditional methods and multilevel  
31 regression for the analysis of multicenter intervention studies. *J Clin Epidemiol*. 2003;56(4):341-50.  
32
- 33 34. State of Rhode Island. Rhode Island's Strategic Plan on Addiction and Overdose: Four Strategies to  
34 Alter the Course of an Epidemic. Providence, Rhode Island: Governor's Overdose Prevention and  
35 Intervention Task Force; 2015.  
36
- 37 35. Marshall BDL, Yedinak JL, Goyer J, Green TC, Koziol JA, Alexander-Scott N. Development of a  
38 statewide, publicly accessible drug overdose surveillance and information system. *Am J Public Health*.  
39 2017;107(11):1760-3.  
40
- 41 36. McClellan C, Lambdin BH, Ali MM, Mutter R, Davis CS, Wheeler E, et al. Opioid-overdose laws  
42 association with opioid use and overdose mortality. *Addict Behav*. 2018;86:90-5.  
43
- 44 37. Koester S, Mueller SR, Raville L, Langegger S, Binswanger IA. Why are some people who have  
45 received overdose education and naloxone reticent to call emergency medical services in the event of  
46 overdose? *Int J Drug Policy*. 2017;48:115-24.  
47  
48  
49  
50  
51  
52  
53  
54  
55  
56  
57  
58  
59  
60



**Authors' Contributions:**

WCG led the manuscript preparation. The research was conceived by FLB and BDLM. All authors provided feedback on several drafts of the study protocol and this manuscript. WCG, BDLM, EAS, MGB, DD, KJL, LM, RCM, TN, GAO, SER, JLY, and FLB read and approved of the final manuscript.

**Funding Statement:**

This research is funded by a grant from the Laura and John Arnold Foundation (Principal Investigators: Francesca L. Beaudoin, MD, PhD and Brandon D.L. Marshall, PhD) with support from the Center for Biomedical Research Excellence (COBRE) on Opioids and Overdose at Rhode Island Hospital (funded by the National Institute of General Medical Sciences, Award: P20GM125507; Principal Investigator: Josiah D. Rich, MD). In addition, Mr. Goedel is supported by the Brown University Clinical and Community-Based HIV Research Training Fellowship (funded by the National Institute of Mental Health, Award: R25MH083620; Principal Investigator: Amy S. Nunn, ScD).

**Declarations of Competing Interest:**

The authors declare no competing interests.

**Word Count:** 3,928 words



1  
2  
3 **Figure 1. Intervention arms in a randomized clinical trial of an emergency department-based peer**  
4 **recovery support intervention to increase treatment uptake and reduce recurrent overdose among**  
5 **individuals at high risk for opioid overdose**  
6  
7  
8  
9  
10  
11  
12  
13  
14  
15  
16  
17  
18  
19  
20  
21  
22  
23  
24  
25  
26  
27  
28  
29  
30  
31  
32  
33  
34  
35  
36  
37  
38  
39  
40  
41  
42  
43  
44  
45  
46  
47  
48  
49  
50  
51  
52  
53  
54  
55  
56  
57  
58  
59  
60

For peer review only

1  
2  
3  
4  
5  
6  
7  
8  
9  
10  
11  
12  
13  
14  
15  
16  
17  
18  
19  
20  
21  
22  
23  
24  
25  
26  
27  
28  
29  
30  
31  
32  
33  
34  
35  
36  
37  
38  
39  
40  
41  
42  
43  
44  
45  
46  
47  
48  
49  
50  
51  
52  
53  
54  
55  
56  
57  
58  
59  
60

| Certified Peer Recovery Specialist |                                                                                                                                                                                                                                                                | Licensed Clinical Social Worker |                                                                                                                                                                                                                     |
|------------------------------------|----------------------------------------------------------------------------------------------------------------------------------------------------------------------------------------------------------------------------------------------------------------|---------------------------------|---------------------------------------------------------------------------------------------------------------------------------------------------------------------------------------------------------------------|
| 1                                  | <u>Enrollment Visit in Emergency Department</u> <ul style="list-style-type: none"> <li>Intervention based on motivational interviewing plus lived experience of peer recovery specialist</li> <li>Navigate barriers to treatment, provide referrals</li> </ul> | 1                               | <u>Brief Intervention in Emergency Department</u> <ul style="list-style-type: none"> <li>Intervention based on motivational interviewing plus other clinical skills</li> <li>Provide referrals as needed</li> </ul> |
| 2                                  | <u>Community-Based Follow-Up Visit (&lt;48 hours)</u> <ul style="list-style-type: none"> <li>Navigate barriers to treatment and recovery</li> <li>Ongoing peer support</li> <li>Ongoing overdose prevention education</li> </ul>                               |                                 |                                                                                                                                                                                                                     |
| 3                                  | <u>Retention in Peer Recovery Support (≥90 days)</u> <ul style="list-style-type: none"> <li>Promote retention in treatment</li> <li>Ongoing peer support</li> <li>Ongoing overdose prevention education</li> </ul>                                             |                                 |                                                                                                                                                                                                                     |

Figure 1

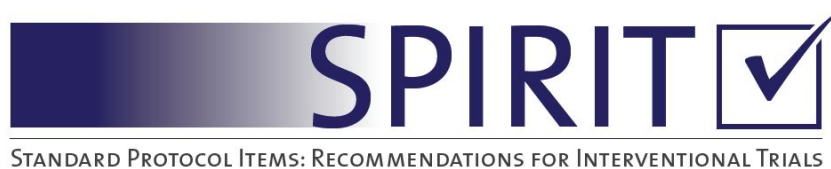

SPIRIT 2013 Checklist: Recommended items to address in a clinical trial protocol and related documents\*

| Section/item                                              | Item No | Page           |
|-----------------------------------------------------------|---------|----------------|
| <b>Administrative information</b>                         |         |                |
| Title                                                     | 1       | Page 1         |
| Trial registration                                        | 2a      | Page 2         |
|                                                           | 2b      | Not Applicable |
| Protocol version                                          | 3       | Not Applicable |
| Funding                                                   | 4       | Page 18        |
| Roles and responsibilities                                | 5a      | Page 1         |
|                                                           | 5b      | Page 1         |
|                                                           | 5c      | Not Applicable |
|                                                           | 5d      | Not Applicable |
| <b>Introduction</b>                                       |         |                |
| Background and rationale                                  | 6a      | Page 3-4       |
|                                                           | 6b      | Page 5         |
| Objectives                                                | 7       | Page 4         |
| Trial design                                              | 8       | Page 4         |
| <b>Methods: Participants, interventions, and outcomes</b> |         |                |
| Study setting                                             | 9       | Page 5         |
| Eligibility criteria                                      | 10      | Page           |
| Interventions                                             | 11a     | Page 5-6       |
|                                                           | 11b     | Not Applicable |
|                                                           | 11c     | Not Applicable |
|                                                           | 11d     | Not Applicable |
| Outcomes                                                  | 12      | Page 7         |

|                         |    |              |
|-------------------------|----|--------------|
| Participant<br>timeline | 13 | Page 5-6, 10 |
| Sample size             | 14 | Page 9       |
| Recruitment             | 15 | Page 9       |

### **Methods: Assignment of interventions (for controlled trials)**

#### Allocation:

|                                        |     |                |
|----------------------------------------|-----|----------------|
| Sequence<br>generation                 | 16a | Page 9         |
| Allocation<br>concealment<br>mechanism | 16b | Page 9         |
| Implementation                         | 16c | Page 9         |
| Blinding<br>(masking)                  | 17a | Page 10        |
|                                        | 17b | Not Applicable |

### **Methods: Data collection, management, and analysis**

|                            |     |                |
|----------------------------|-----|----------------|
| Data collection<br>methods | 18a | Page 10        |
|                            | 18b | Not Applicable |
| Data<br>management         | 19  | Page 10        |
| Statistical<br>methods     | 20a | Page 10        |
|                            | 20b | Page 10        |
|                            | 20c | Not Applicable |

### **Methods: Monitoring**

|                 |     |                |
|-----------------|-----|----------------|
| Data monitoring | 21a | Page 11        |
|                 | 21b | Not Applicable |
| Harms           | 22  | Page 11        |
| Auditing        | 23  | Not Applicable |

### **Ethics and dissemination**

|                             |    |         |
|-----------------------------|----|---------|
| Research ethics<br>approval | 24 | Page 11 |
|-----------------------------|----|---------|

|    |                   |     |                |
|----|-------------------|-----|----------------|
| 1  |                   |     |                |
| 2  | Protocol          | 25  | Page 11        |
| 3  | amendments        |     |                |
| 4  |                   |     |                |
| 5  | Consent or assent | 26a | Page 11        |
| 6  |                   |     |                |
| 7  |                   | 26b | Not Applicable |
| 8  |                   |     |                |
| 9  | Confidentiality   | 27  | Page 11        |
| 10 |                   |     |                |
| 11 | Declaration of    | 28  | Not Applicable |
| 12 | interests         |     |                |
| 13 |                   |     |                |
| 14 | Access to data    | 29  | Page 12        |
| 15 |                   |     |                |
| 16 | Ancillary and     | 30  | Not Applicable |
| 17 | post-trial care   |     |                |
| 18 |                   |     |                |
| 19 | Dissemination     | 31a | Page 12        |
| 20 | policy            |     |                |
| 21 |                   |     |                |
| 22 |                   | 31b | Not Applicable |
| 23 |                   |     |                |
| 24 |                   | 31c | Not Applicable |
| 25 |                   |     |                |
| 26 |                   |     |                |
| 27 | <b>Appendices</b> |     |                |
| 28 |                   |     |                |
| 29 | Informed consent  | 32  | Not Applicable |
| 30 | materials         |     |                |
| 31 |                   |     |                |
| 32 | Biological        | 33  | Not Applicable |
| 33 | specimens         |     |                |

---

\*It is strongly recommended that this checklist be read in conjunction with the SPIRIT 2013 Explanation & Elaboration for important clarification on the items. Amendments to the protocol should be tracked and dated. The SPIRIT checklist is copyrighted by the SPIRIT Group under the Creative Commons "[Attribution-NonCommercial-NoDerivs 3.0 Unported](https://creativecommons.org/licenses/by-nc-nd/3.0/)" license.

# BMJ Open

## A Randomized Clinical Trial of an Emergency Department-Based Peer Recovery Support Intervention to Increase Treatment Uptake and Reduce Recurrent Overdose among Individuals at High Risk for Opioid Overdose: Study Protocol for the Navigator Trial

|                                 |                                                                                                                                                                                                                                                                                                                                                                                                                                                                                                                                                                                                                                                                                                                                                                                                                                                                                                                                                                                                                                                                                                                                                                                                                                                                                                                                                                                                                           |
|---------------------------------|---------------------------------------------------------------------------------------------------------------------------------------------------------------------------------------------------------------------------------------------------------------------------------------------------------------------------------------------------------------------------------------------------------------------------------------------------------------------------------------------------------------------------------------------------------------------------------------------------------------------------------------------------------------------------------------------------------------------------------------------------------------------------------------------------------------------------------------------------------------------------------------------------------------------------------------------------------------------------------------------------------------------------------------------------------------------------------------------------------------------------------------------------------------------------------------------------------------------------------------------------------------------------------------------------------------------------------------------------------------------------------------------------------------------------|
| Journal:                        | <i>BMJ Open</i>                                                                                                                                                                                                                                                                                                                                                                                                                                                                                                                                                                                                                                                                                                                                                                                                                                                                                                                                                                                                                                                                                                                                                                                                                                                                                                                                                                                                           |
| Manuscript ID                   | bmjopen-2019-032052.R3                                                                                                                                                                                                                                                                                                                                                                                                                                                                                                                                                                                                                                                                                                                                                                                                                                                                                                                                                                                                                                                                                                                                                                                                                                                                                                                                                                                                    |
| Article Type:                   | Protocol                                                                                                                                                                                                                                                                                                                                                                                                                                                                                                                                                                                                                                                                                                                                                                                                                                                                                                                                                                                                                                                                                                                                                                                                                                                                                                                                                                                                                  |
| Date Submitted by the Author:   | 15-Oct-2019                                                                                                                                                                                                                                                                                                                                                                                                                                                                                                                                                                                                                                                                                                                                                                                                                                                                                                                                                                                                                                                                                                                                                                                                                                                                                                                                                                                                               |
| Complete List of Authors:       | Goedel, William; Brown University School of Public Health, Department of Epidemiology<br>Marshall, Brandon; Brown University, Department of Epidemiology<br>Samuels, Elizabeth; Brown University Warren Alpert Medical School, Department of Emergency Medicine<br>Brinkman, Mark; Rhode Island Hospital, Department of Emergency Medicine<br>Dettor, Debra; Anchor Recovery Community Center<br>Langdon, Kirsten; Brown University Warren Alpert Medical School, Department of Psychiatry and Human Behavior<br>Mahoney, Linda; Rhode Island Department of Behavioral Healthcare Developmental Disabilities and Hospitals<br>Merchant, Roland; Brown University School of Public Health, Department of Epidemiology; Brown University Warren Alpert Medical School, Department of Emergency Medicine<br>Nizami, Tarek; Rhode Island Hospital, Department of Emergency Medicine<br>O'Toole, George; Anchor Recovery Community Center<br>Ramsey, Susan; Brown University Warren Alpert Medical School, Department of Psychiatry and Human Behavior; Brown University Warren Alpert Medical School, Department of Medicine<br>Yedinak, Jesse; Brown University School of Public Health, Department of Epidemiology<br>Beaudoin, Francesca L; Brown University Warren Alpert Medical School, Department of Emergency Medicine; Brown University School of Public Health, Department of Health Services, Policy, and Practice |
| <b>Primary Subject Heading</b>: | Addiction                                                                                                                                                                                                                                                                                                                                                                                                                                                                                                                                                                                                                                                                                                                                                                                                                                                                                                                                                                                                                                                                                                                                                                                                                                                                                                                                                                                                                 |
| Secondary Subject Heading:      | Emergency medicine, Public health, Patient-centred medicine, Evidence based practice                                                                                                                                                                                                                                                                                                                                                                                                                                                                                                                                                                                                                                                                                                                                                                                                                                                                                                                                                                                                                                                                                                                                                                                                                                                                                                                                      |
| Keywords:                       | ACCIDENT & EMERGENCY MEDICINE, PUBLIC HEALTH, Substance misuse < PSYCHIATRY                                                                                                                                                                                                                                                                                                                                                                                                                                                                                                                                                                                                                                                                                                                                                                                                                                                                                                                                                                                                                                                                                                                                                                                                                                                                                                                                               |
|                                 |                                                                                                                                                                                                                                                                                                                                                                                                                                                                                                                                                                                                                                                                                                                                                                                                                                                                                                                                                                                                                                                                                                                                                                                                                                                                                                                                                                                                                           |

1  
2  
3  
4  
5  
6  
7  
8  
9  
10  
11  
12  
13  
14  
15  
16  
17  
18  
19  
20  
21  
22  
23  
24  
25  
26  
27  
28  
29  
30  
31  
32  
33  
34  
35  
36  
37  
38  
39  
40  
41  
42  
43  
44  
45  
46  
47  
48  
49  
50  
51  
52  
53  
54  
55  
56  
57  
58  
59  
60



1  
2  
3 **A Randomized Clinical Trial of an Emergency Department-Based Peer Recovery Support**  
4 **Intervention to Increase Treatment Uptake and Reduce Recurrent Overdose among Individuals at**  
5 **High Risk for Opioid Overdose: Study Protocol for the Navigator Trial**  
6  
7  
8

9 William C. Goedel, BA<sup>1</sup>

10 Brandon D.L. Marshall, PhD<sup>1</sup>

11 Elizabeth A. Samuels, MD, MPH<sup>2</sup>

12 Mark G. Brinkman, BS<sup>3</sup>

13 Debra Dettor, MS, CPRS<sup>4</sup>

14 Kirsten J. Langdon, PhD<sup>5</sup>

15 Linda Mahoney, CAADC, CCS<sup>6</sup>

16 Roland C. Merchant, MD, ScD, MPH<sup>1,2</sup>

17 Tarek Nizami, MD<sup>3</sup>

18 George A. O'Toole, BS, CPRS<sup>4</sup>

19 Susan E. Ramsey, PhD<sup>5,7</sup>

20 Jesse L. Yedinak, MPA<sup>1</sup>

21 Francesca L. Beaudoin, MD, PhD<sup>2,8</sup>

22  
23  
24  
25  
26  
27  
28  
29  
30  
31 1. Department of Epidemiology, School of Public Health, Brown University, Providence, RI

32 2. Department of Emergency Medicine, Warren Alpert Medical School, Brown University, Providence, RI

33 3. Department of Emergency Medicine, Rhode Island Hospital, Providence, RI

34 4. Anchor Recovery Community Center, Pawtucket, RI

35 5. Department of Psychiatry and Human Behavior, Warren Alpert Medical School, Brown University, Providence, RI

36 6. Rhode Island Department of Behavioral Healthcare, Developmental Disabilities, and Health, Cranston, RI

37 7. Department of Medicine, Warren Alpert Medical School, Brown University, Providence, RI

38 8. Department of Health Services, Policy, and Practice, School of Public Health, Brown University, Providence, RI

39  
40  
41  
42  
43  
44 **Address Correspondence to:**

45 Francesca L. Beaudoin, MD, PhD; Brown University Alpert Medical School Department of Emergency  
46 Medicine; 55 Claverick Street, 2nd Floor, Providence, Rhode Island, United States, 02903. E-mail Address:  
47 francesca\_beaudoin@brown.edu. Phone Number: (401) 444-5411. Fax Number: (401) 444-4307.  
48  
49  
50  
51  
52  
53  
54  
55  
56  
57  
58  
59  
60



## ABSTRACT

**Introduction:** Effective approaches to increase engagement in treatment for opioid use disorder (OUD) and reduce the risk of recurrent overdose and death following emergency department (ED) presentation for opioid overdose remain unknown. As such, we aim to compare the effectiveness of behavioral interventions delivered in the ED by certified peer recovery support specialists relative to those delivered by licensed clinical social workers (LCSWs) in promoting OUD treatment uptake and reducing recurrent ED visits for opioid overdose.

**Methods and Analysis:** Adult ED patients who are at high risk for opioid overdose (i.e., are being treated for an opioid overdose or identified by the treating physician as having OUD) ( $n = 650$ ) will be recruited from two emergency departments in a single health care system in Providence, Rhode Island into a two-arm randomized trial with 18 months of follow-up post-randomization. Eligible participants will be randomly assigned (1:1) in the ED to receive a behavioral intervention from a certified peer recovery support specialist or a behavioral intervention from an LCSW. The primary outcomes are engagement in formal OUD treatment within 30 days of the initial ED visit and recurrent ED visits for opioid overdose within 18 months of the initial ED visit, as measured through statewide administrative records.

**Ethics and Dissemination:** This protocol was approved by the Rhode Island Hospital institutional review board (Approval Number: 212418). Data will be presented at national and international conferences and published in peer-reviewed journals.

**Trial Registration:** NCT03684681 (ClinicalTrials.gov)

## KEYWORDS

Opioid Overdose; Emergency Department; Peer Support; Recovery; Randomized Trial

### STRENGTHS AND LIMITATIONS

- This study represents the first randomized controlled trial to assess the impact of a peer recovery support intervention on uptake of OUD treatment and recurrent ED presentation for opioid-involved overdose.
- This study leverages a statewide comprehensive data sharing infrastructure to use administrative records to characterize the primary outcomes (e.g., OUD treatment enrollment, recurrent ED presentation), thus overcoming biases associated with self-reported outcomes and loss to follow-up in previous studies.
- Although the administrative databases used to characterize the primary outcomes are meant to be representative, they are by no means comprehensive (i.e., individuals who enroll in OUD treatment programs or who present to EDs in other states will not be captured in these resources).

## INTRODUCTION

### Background and Rationale

Deaths attributable to accidental drug overdose, particularly those involving opioids, have reached epidemic levels in the United States (US) (1-4). In the past two decades, US overdose mortality rates have more than tripled, from 6.2 per 100,000 persons in 2000 to 21.7 per 100,000 persons in 2017 (2, 3). There have been 700,000 opioid overdose deaths between 2000 to 2015 in the US (5), and the crisis is expected to worsen under current trends (6). Since 2013, the opioid overdose epidemic has been marked by significant increases in deaths involving powerful synthetic opioids (e.g., fentanyl) (3). The burden of the drug overdose epidemic is greatly elevated in New England, where fentanyl has been present in the illicit drug supply since as early as 2012 (7-10). Rhode Island has one of the highest drug overdose rates in the nation (3), and in 2014 reported the third and fourth highest rate of opioid-related emergency department (ED) visits and inpatient hospital stays, respectively (11).

In addition to increases in fatal opioid overdoses, EDs have had substantial increases in visits for non-fatal opioid overdoses (12-14). About 120,000 ED visits were reported for suspected non-fatal opioid overdoses between July 2016 and September 2017 in sixteen states participating in the Enhanced State Opioid Overdose Surveillance, representing a 35% increase over this period (15). As such, the ED serves as a critical intervention site for providing services to people at high risk of opioid overdose and those with opioid use disorder (OUD). In the year after presenting to the ED for a drug overdose, a person is at heightened risk for death (16, 17). In a nested case-control study in New York, the odds of death due to prescription drug overdose were 4.9 times higher for those with two ED visits, 16.6 times higher for those with three ED visits, and 48.2 times higher for those with four or more visits relative to one ED visit or less in the year preceding death (16). Thus, the ED is both a critical and timely place for intervention and the reason for the ED visit itself (i.e., overdose) can be used as an opportunity to identify patients at highest risk of fatal drug overdose and deliver interventions (18).

The most effective means to promote engagement in substance use disorder (SUD) treatment and reduce the risk of recurrent overdose and death following presentation to an ED for opioid overdose remains unknown. One of the only randomized studies of overdose education combined with a brief motivational interviewing-based intervention delivered in the ED by licensed mental health counselors resulted in reductions in overdose risk behaviors among individuals presenting to the ED and reporting non-medical prescription opioid use (19). However, a trial deploying a similar intervention did not reduce overdose rates or prevent subsequent ED visits or hospitalizations compared to usual care (20). It is possible, however, that these types of interventions may be more effective if delivered by people with lived experiences with

1  
2  
3 SUD and recovery. Peer-based interventions are an effective component of care across non-clinical settings  
4 and in other aspects of health care for other conditions (21). A recent systematic review by Ramchand and  
5 colleagues (2017) found that group-based interventions that use peers as educators commonly improve  
6 knowledge, attitudes, beliefs, and perceptions and improve connectedness and engagement with health  
7 promotion activities (21). Further, a recent systematic review of peer recovery support services in care for  
8 substance use disorder found that existing randomized controlled trials have been subject to several  
9 limitations, particularly poorly defined and non-manualized roles for peers, and, as such, there remains a  
10 need for more rigorous evaluation to determine the efficacy, effectiveness, and cost-effectiveness of peer  
11 recovery support services (22). However, little is known about their effectiveness in improving outcomes  
12 for persons at high risk for opioid overdose. In response to Rhode Island's overdose crisis, individuals in  
13 long-term recovery with specialized training in SUD management, known as certified peer recovery support  
14 specialists, have been deployed in EDs since 2014 (23). The goal of their work is to help patients navigate  
15 obstacles to recovery through problem-solving, goal setting, avoiding relapse triggers, and planning and  
16 obtaining services. Despite the promise of and significant national interest in this approach (24), no studies  
17 have rigorously evaluated whether peer-based behavioral interventions delivered in the ED result in  
18 improved outcomes for patients at high risk of opioid overdose.  
19  
20  
21  
22  
23  
24  
25  
26  
27  
28  
29

### 30 **Objectives**

31 We aim to test the effectiveness of behavioral interventions delivered in the ED by certified peer recovery  
32 support specialists in improving outcomes for patients at high risk of opioid overdose relative to those  
33 delivered by licensed clinical social workers (LCSWs). We hypothesize that, because certified peer  
34 recovery support specialists are able to draw from their own lived experiences with SUD and recovery,  
35 patients who are randomly assigned to receive a behavioral intervention from a peer recovery support  
36 specialist, as compared to receiving an intervention from an LCSW, will be: (1) more likely to engage in  
37 formal SUD treatment within 30 days following the initial visit, and (2) less likely to experience a recurrent  
38 ED visit for an opioid overdose during the succeeding 18 months.  
39  
40  
41  
42  
43  
44  
45

### 46 **Trial Design**

47 The trial utilizes a parallel design where patients at high risk for opioid overdose who present to the ED are  
48 randomly assigned 1:1 to receive a behavioral intervention from a certified peer recovery support specialist  
49 or an LCSW.  
50  
51  
52  
53  
54  
55  
56  
57  
58  
59  
60

## **METHODS: PARTICIPANTS, INTERVENTIONS, OUTCOMES**

### **Study Setting**

Rhode Island is home to over one million residents. Since 2000, the state has experienced a high burden of opioid overdose. According to the 2016–2017 cycle of the National Survey on Drug Use and Health, 4.7% of Rhode Islanders used heroin or misused a prescription opioid in the past year (25). Between 2013 and 2017, the age-adjusted rate of death due to opioid overdose increased by 44.2%, from 18.1 to 26.1 per 100,000 persons, with these increases largely driven by synthetic opioids other than methadone (16.8% of opioid overdose deaths in 2013 versus 72.6% in 2017) (26).

### **Eligibility Criteria**

To be eligible, participants must also be in the ED because they are: (1) being treated for an opioid overdose; (2) receiving treatment related to OUD (e.g., infectious complication of injection drug use, opioid withdrawal); or (3) self-report an opioid overdose within the previous 12 months. The presence of an opioid overdose will be determined by the treating physician and is generally defined as (1) the presence of decreased levels of consciousness or respiratory depression and (2) occurring after the consumption of opioids or resolving after the administration of naloxone. Potential participants will be deemed ineligible if they are critically ill or injured, have previously enrolled in the trial, are in police custody or incarcerated, pregnant, or live outside of Rhode Island. Patients who are critically ill or injured will be eligible for screening and enrollment once cleared to participate by their treating physician.

### **Patient and Public Involvement**

No patient involved.

### **Interventions**

#### Current Standard of Care

The current standard of care following an ED visit for an opioid overdose at the study sites is to receive a behavioral intervention delivered by a certified peer recovery support specialist or an LCSW. Whether a patient meets with a social worker or a peer recovery support specialist can depend on the time of day, staff availability, and preferences or views of the provider or patient. In the trial, patients will be randomly assigned to receive a behavioral intervention in the ED delivered by (1) a staff LCSW, or (2) a certified peer recovery support specialist trained by the Anchor Recovery Community Center (Figure 1).

### Behavioral Intervention Delivered by Certified Peer Recovery Support Specialists

The Anchor Recovery Community Center is Rhode Island's first community-based peer recovery center (23). It is designed as an access point for those with SUD, providing services such as job counseling, health and wellness activities, and individualized long-term peer recovery coaching (23). Through one of its outreach programs, known as AnchorED, the Anchor Recovery Community Center has deployed certified peer recovery support specialists to EDs across Rhode Island since 2014 (23). As part of AnchorED, certified peer recovery support specialists arrive in the ED within 30 minutes of consultation, assess individuals for readiness to seek treatment, provide linkage to treatment, and educate patients on overdose prevention and response (23). Peer recovery specialists call every day for ten days in an attempt to make contact following discharge from the ED. Once contact is made, peer recovery specialists and their clients make plans for regular contact and follow-up. There are 30 peer recovery support specialists available to deliver these interventions between the two study sites.

To become a certified peer recovery support specialist, applicants must be in recovery for at least two years, undergo a 45-hour training program at Anchor Recovery Community Center based on the Connecticut Community for Addiction Recovery curriculum, and accrue 500 hours of supervised work experience providing peer recovery support services (23). All peer recovery support specialists obtain certification from the International Certification and Reciprocity Consortium (23). The certification program focuses on advocacy, wellness and recovery, motivational interviewing techniques, mentoring and education, and ethics as well as additional training on the provision of trauma-informed care and the transtheoretical model of behavior change. In addition to employing motivational interviewing techniques, peer recovery support specialists support individuals' self-efficacy and prevent relapse by addressing social, environmental, and personal factors, such as awareness and avoidance of relapse triggers, polysubstance use, stigma associated with SUD and their treatment, knowledge of treatment services (including the use of medications for OUD treatment), and addressing financial and transportation barriers to treatment (23). Certified peer recovery support specialists are uniquely positioned to deliver behavioral interventions to individuals who have experienced overdose as they couple their training with lived experiences of SUD and recovery (23).

### Behavioral Intervention Delivered via Licensed Clinical Social Workers

There are 35 full and part-time LCSW on staff in the Department of Social Work between the two study sites. Staff social workers arrive in the ED within 30 minutes of consultation. Staff social workers are trained and available to deliver interventions to patients presenting with an opioid overdose and/or with OUD in the ED. As LCSWs, these individuals are capable of delivering a variety of interviewing and intervention techniques that are rooted in social work theory and practice models. Social work practice

1  
2  
3 models are strategies that the social worker can incorporate into their interventions to help people meet their  
4 goals (e.g., task-centered practice, cognitive behavioral therapy, crisis intervention model). Although the  
5 intervention delivered by LCSWs and their associated theoretical underpinnings are similar in some  
6 respects to those associated with those delivered by certified peer recovery support specialists, the social  
7 worker intervention is intended to be a single session with referral to SUD treatment.  
8  
9  
10

## 11 12 **Outcomes**

### 13 Primary Outcomes

14  
15 The two primary outcomes of the trial are (1) engagement with a formal SUD treatment program within 30  
16 days of the initial ED visit, and (2) recurrent ED visit(s) for a suspected opioid overdose over 18 months.  
17 Both endpoints will be assessed via statewide administrative databases as outlined below. All records will  
18 be linked deterministically to participant data using identifiable information in a secure, Health Insurance  
19 Portability and Accountability Act (HIPAA)-compliant computing environment.  
20  
21  
22  
23

24  
25 The first primary outcome of the trial is treatment engagement, defined as admission to a formal, publicly  
26 licensed SUD treatment program within 30 days of the initial ED visit. The Rhode Island Department of  
27 Behavioral Health, Developmental Disabilities, and Hospitals maintains the Behavioral Health Online  
28 Database (BHOLD), a state database containing information on all admission and discharge events of  
29 clients of all licensed behavioral healthcare organizations in the state (27). BHOLD is a comprehensive  
30 database on all licensed treatment programs, including inpatient detoxification programs, day treatment  
31 programs, residential treatment programs, intensive outpatient programs, and opioid treatment programs  
32 (27). Records in BHOLD include individuals who receive methadone or buprenorphine from a licensed  
33 opioid treatment program. In addition to this data resource, records from the prescription drug monitoring  
34 program (PDMP) maintained by the Rhode Island Department of Health will be used to supplement  
35 BHOLD to identify patients who initiate buprenorphine in office-based settings (28).  
36  
37  
38  
39  
40  
41  
42  
43

44 The second primary outcome of the trial is recurrent visits to the ED for a suspected opioid overdose,  
45 defined as any presentation to an ED in Rhode Island for an opioid overdose within the 18 months following  
46 the initial ED visit at the two sites. The Rhode Island Quality Institute maintains CurrentCare, a health  
47 information exchange that provides a unified data system for electronic medical records (EMRs) for all  
48 major health systems in Rhode Island, allowing us to identify repeat visits for suspected opioid overdoses  
49 at all twelve EDs in the state (29). Opioid overdoses will be defined according to the Centers for Disease  
50 Control and Prevention (CDC) guidelines for all opioid poisonings and utilize *International Statistical*  
51 *Classification of Diseases and Related Health Problems* (ICD) codes (30, 31). The Rhode Island  
52  
53  
54  
55  
56  
57  
58  
59  
60



1  
2  
3 Department of Health mandates that all suspected overdoses presenting to a hospital be reported to the  
4 department within 48 hours. This data source, referred to as the 48-hour overdose surveillance system (32),  
5 will be used to supplement the EMRs in CurrentCare.  
6  
7

### 8 9 **Sample Size**

10  
11 Based on preliminary assessments from the study sites, we are assuming that 7% of participants assigned  
12 to receive a behavioral intervention from an LCSW will enroll in a formal SUD treatment program within  
13 30 days of their ED visit. Given this assumption for a sample size of 650 participants, we have at least 80%  
14 power to detect a two-fold increase in treatment engagement among participants assigned to receive a  
15 behavioral intervention from a peer recovery specialist (Risk Difference: 0.07; 95% CI: 0.02–0.12). This  
16 two-fold increase was identified by community stakeholders as an appropriate benchmark for this outcome.  
17 Based on a recent medical record review from one of the study sites and estimates from other studies (20,  
18 33), we are assuming that 15% of participants who receive a behavioral intervention from an LCSW will  
19 experience a subsequent repeat ED visit for opioid overdose. Given this assumption and our sample, we  
20 have at least 80% power to detect a 50% relative reduction in the risk of recurrent ED visits for opioid  
21 overdose within 18 months following the initial visit among those assigned to receive a behavioral  
22 intervention from a peer recovery specialist (Risk Difference: 0.075; 95% CI: 0.02–0.13).  
23  
24  
25  
26  
27  
28  
29  
30

### 31 **Recruitment**

32  
33 Participants will be recruited from two EDs—Level 1 and Level 2 trauma centers—located in the state’s  
34 capital of Providence. Together, these two EDs receive over 175,000 adult visits each year. Between 2017  
35 and 2018, the two EDs reported a total of 1,446 visits for suspected opioid overdoses, representing 45% of  
36 all ED visits for suspected opioid overdose reported to the Rhode Island Department of Health ( $n = 3,239$ ).  
37 A consecutive sample of ED patients will be assessed for eligibility by one of eleven full-time research  
38 assistants employed in the two EDs who can recruit participants 24 hours per day, seven days per week.  
39 Potential participants will be identified by the research assistants by screening EMRs or by referral from  
40 treating providers in the ED. Potential participants will be considered eligible if they are 18 years of age or  
41 older and speak English. Given the specificity of the pool of LCSWs and certified peer recovery support  
42 specialists to the ED, recruitment will occur in the ED only.  
43  
44  
45  
46  
47  
48  
49

## 50 **METHODS: ASSIGNMENT OF INTERENTIONS**

### 51 **Allocation**

52  
53 Participants will be randomly assigned 1:1 within each study site to receive either a behavioral intervention  
54 delivered by a certified peer recovery support specialist or by an LCSW. Allocations will be randomly  
55  
56  
57  
58  
59



1  
2  
3 assigned using the REDCap randomization feature. The randomization schedule will be maintained by a  
4 data manager not involved with participant recruitment or the final study analyses.  
5  
6  
7

### 8 **Blinding (Masking)**

9 Participants and providers cannot be blinded to their intervention assignment. However, investigators and  
10 analysts performing the study analyses will be blinded to arm allocation.  
11  
12  
13

## 14 **METHODS: DATA COLLECTION, MANAGEMENT, ANALYSIS**

### 15 **Data Collection Methods**

16 The primary outcomes assessments will rely on the use of administrative data (see below).  
17  
18  
19

### 20 **Data Management**

21 All data collection instruments will be designed using Research Electronic Data Capture (REDCap)  
22 software and administered using a tablet computer connected to the wireless network at the two study sites.  
23  
24  
25  
26

### 27 **Statistical Methods**

28 We will use an intention-to-treat (ITT) approach in all analyses to estimate the average treatment effect.  
29 For the two primary outcomes (engagement in formal SUD treatment within 30 days of the initial ED visit  
30 and occurrence of a subsequent ED visit for opioid overdose within 18 months of the initial ED visit), we  
31 will use separate logistic regression models with indicators for treatment allocation. Analyses with binary  
32 outcomes were selected based on input from community stakeholders. In exploratory analyses, we will use  
33 survival methods (e.g., Cox proportional hazards models) to assess the impact of treatment on the time to  
34 events for both outcomes (i.e., days from discharge to enrollment in formal SUD treatment and days from  
35 discharge to first recurrent ED visit for opioid overdose). In addition, on an exploratory basis, we will  
36 conduct moderation analyses to understand potential heterogeneity of treatment effects by age and gender.  
37 Given the multicenter design of the trial, the effect of treatment site will be quantified by the intraclass  
38 correlation coefficient (ICC), representing the variance due to the between-center variability (34). Should  
39 the ICC suggest that a large portion of the variance is explained by between-center variability, we will  
40 control for treatment site using a generalized estimating equations (GEE) approach to estimate population-  
41 average treatment effects across the two sites.  
42  
43  
44  
45  
46  
47  
48  
49  
50  
51

## 52 **METHODS: MONITORING**

### 53 **Data Monitoring**

54  
55  
56  
57  
58  
59  
60

1  
2  
3 A single data safety monitoring board (DSMB) will be convened and include members external to the  
4 research team and funding source and without potential conflicts of interest. The DSMB will be notified  
5 within 24 hours of any serious adverse event in which the relationship to the study is possible. The DSMB  
6 will convene at the earliest possible time (no more than 30 days from time of notification) to discuss this  
7 adverse event. Further, the DSMB will meet on a quarterly basis with the study coordinator and co-principal  
8 investigators to review protocol adherence and adverse events.  
9  
10  
11  
12  
13

### 14 **Harms**

15 An adverse event is considered any physical or clinical change experienced by the patient, including the  
16 onset of new symptoms or the exacerbation of pre-existing conditions.  
17  
18  
19

## 20 **ETHICS AND DISSEMINATION**

### 21 **Research Ethics Approval**

22 All protocols have been approved by the institutional review boards at the Lifespan health system  
23 representing the two clinical sites (Approval Number: 212418).  
24  
25  
26  
27

### 28 **Protocol Amendments**

29 Any modifications to the protocol which may impact on the conduct of the study, potential benefit of the  
30 patient, or may affect patient safety, including changes of study objectives, study design, patient population,  
31 sample sizes, study procedures, or significant administrative aspects will require a formal amendment.  
32  
33  
34  
35

### 36 **Consent**

37 Trained research assistants will introduce and discuss the trial with potential participants. These potential  
38 participants will then be able to have an informed discussion with the research assistant about their potential  
39 participation. Following this discussion research assistants will obtain written informed consent.  
40  
41  
42  
43

### 44 **Confidentiality**

45 The privacy of all trial participants is protected by a Certificate of Confidentiality issued by the National  
46 Institutes of Health (NIH). Unique identification numbers will be assigned to participants. All data forms  
47 and interviews will be coded with this number rather than with a name. All paper forms will be stored in  
48 locked file cabinets. Informed consent documents will be stored separately, as they contain identifying  
49 information. Upon completion of the study, identifying information will be destroyed.  
50  
51  
52  
53  
54

### 55 **Access to Data**

1  
2  
3 The institutional review boards at the Lifespan health system representing the two clinical sites will have  
4 access to anonymized data at their discretion. However, no third-party investigators will have access to  
5 study data prior to synthesis and dissemination.  
6  
7

### 8 9 **Dissemination Policy**

10  
11 The study has been registered on ClinicalTrials.gov. A summary of the results of the trial will be published  
12 there when available. Results will be published at national scientific meetings and the final results will be  
13 submitted for publication in peer-reviewed journals.  
14  
15

### 16 17 **DISCUSSION**

18  
19 The AnchorED program of Anchor Recovery Community Center, which deploys certified peer recovery  
20 support specialists to EDs across Rhode Island to deliver behavioral interventions to individuals who have  
21 experienced an opioid overdose, is the first statewide program of its kind in the nation (23). Despite a lack  
22 of evidence to demonstrate the effectiveness of this program and improved long-term outcomes for patients,  
23 several other jurisdictions in the US have created or are initiating programs based on the AnchorED model  
24 (24). Given the intense interest in peer recovery models, the results of this trial have a strong potential to  
25 fundamentally change clinical practice paradigms for treating patients at high risk for opioid overdose who  
26 present to EDs across the nation.  
27  
28  
29  
30  
31  
32

33 The current study benefits from support from a unique policy environment in Rhode Island. In 2015,  
34 Governor Gina Raimondo signed an executive order to establish the Rhode Island Overdose Prevention and  
35 Intervention Task Force, which charged experts to develop a strategic plan to guide efforts to tackle the  
36 state's overdose crisis (35). An important outcome of this plan was a comprehensive data sharing  
37 infrastructure between key state agencies (including the Rhode Island Departments of Health and  
38 Behavioral Healthcare, Developmental Disabilities, and Hospitals) and academic researchers (36). These  
39 data sharing agreements offer unprecedented access to population-based data on overdose morbidity and  
40 mortality (36). As a result, the trial investigators can create a large database linking participant data with  
41 multiple administrative databases to ascertain our primary and secondary outcomes. The ability to conduct  
42 these robust data linkages is an important methodological innovation that overcomes biases associated with  
43 self-reported outcomes and loss to follow-up in previous studies.  
44  
45  
46  
47  
48  
49  
50  
51

52 The results of this trial will need to be considered in light of some caveats. Although Good Samaritan laws  
53 are present in many jurisdictions across the US, including Rhode Island, to protect individuals from criminal  
54 prosecutions (37), many people do not call emergency medical services in the event of an overdose (38). It  
55  
56  
57  
58  
59  
60

1  
2  
3 is possible that the intervention may increase participants' self-efficacy and willingness to engage with  
4 emergency medical services in the event of an overdose. As a result, those receiving the peer recovery  
5 intervention might be more likely to present to the ED in the event of an overdose. Should the intervention  
6 reduce the overall rate of non-fatal overdose but increase the proportion of non-fatal overdoses that are  
7 treated in the ED, the findings related to the impact of the intervention on recurrent ED visits may be null  
8 or counterintuitive. Although the administrative databases used to characterize the primary outcomes are  
9 meant to be representative, they are by no means comprehensive. Individuals who enroll in SUD treatment  
10 programs or who present to EDs in other states will not be captured in these resources. Given the pragmatic  
11 nature of the trial, fidelity monitoring and process checking are not being conducted, thus limiting potential  
12 understanding of what components of the intervention were performed should they be deemed efficacious.  
13  
14  
15  
16  
17  
18  
19

20 This trial represents the first systematic evaluation of behavioral interventions delivered by certified peer  
21 recovery support specialists in the ED to individuals at high risk for opioid overdose. Should the trial be  
22 successful, its findings have the potential to establish the evidence base for peer recovery support services  
23 as an effective intervention and provide support for the large-scale implementation of these services in EDs.  
24 Amidst a national crisis, peer recovery support interventions could be an effective means for improving  
25 SUD treatment engagement and reducing rates of fatal and non-fatal overdose.  
26  
27  
28  
29  
30  
31  
32  
33  
34  
35  
36  
37  
38  
39  
40  
41  
42  
43  
44  
45  
46  
47  
48  
49  
50  
51  
52  
53  
54  
55  
56  
57  
58  
59  
60

## References

1. Rudd RA, Seth P, David F, Scholl L. Increases in drug and opioid-involved overdose deaths - United States, 2010–2015. *MMWR Morb Mortal Wkly Rep.* 2016;65(50–51):1445–52.
2. Rudd RA, Aleshire N, Zibbell JE, Gladden RM. Increases in drug and opioid overdose deaths - United States, 2000–2014. *MMWR Morb Mortal Wkly Rep.* 2016;64(50–51):1378–82.
3. Scholl L, Seth P, Kariisa M, Wilson N, Baldwin G. Drug and opioid-involved overdose deaths - United States, 2013–2017. *MMWR Morb Mortal Wkly Rep.* 2018;67(5152):1419–27.
4. Seth P, Scholl L, Rudd RA, Bacon S. Overdose deaths involving opioids, cocaine, and psychostimulants - United States, 2015–2016. *MMWR Morb Mortal Wkly Rep.* 2018;67(12):349–58.
5. Chen Q, Larochelle MR, Weaver DT, Lietz AP, Mueller PP, Mercaldo S, et al. Prevention of prescription opioid misuse and project overdose deaths in the United States. *JAMA Netw Open.* 2019;2(2):e187621.
6. Kiang MV, Basu S, Chen J, Alexander MJ. Assessment of changes in the geographical distribution of opioid-related mortality across the United States by opioid type, 1999–2016. *JAMA Netw Open.* 2019;2(2):e190040.
7. Springer YP, Gladden RM, O’Donnell J, Seth P. Fentanyl drug submissions – United States, 2010–2017. *MMWR Morb Mortal Wkly Rep.* 2019;68(2):41–2.
8. Mercado-Crespo MC, Sumner SA, Spelke MB, Sugerman DE, Stanley C. Increase in fentanyl-related overdose deaths - Rhode Island, November 2013–March 2014. *MMWR Morb Mortal Wkly Rep.* 2014;63(24):531.
9. Somerville NJ, O’Donnell J, Gladden RM, Zibbell JE, Green TC, Younkin M, et al. Characteristics of fentanyl overdose - Massachusetts, 2014–2016. *MMWR Morb Mortal Wkly Rep.* 2017;66(14):383–6.
10. Tommassoni AJ, Hawk KF, Jubanyik K, Noguee DP, Durant T, Lynch KL, et al. Multiple fentanyl overdoses - New Haven, Connecticut, June 23, 2016. *MMWR Morb Mortal Wkly Rep.* 2017;66(4):107–11.
11. Weiss AJ, Elixhauser A, Barrett ML, Steiner CA, Bailey MK, O’Malley L. Opioid-related inpatient stays and emergency department visits by state, 2009–2014. Rockville, Maryland: Agency for Healthcare Research and Quality; 2016.
12. Hasegawa K, Espinola JA, Brown DFM, Camargo CA. Trends in U.S. emergency department visits for opioid overdose, 1993–2010. *Pain Med.* 2014;15(10):1765–70.
13. Mazer-Amirshahi M, Sun C, Mullins P, Perrone J, Nelson L, Pines JM. Trends in emergency department resource utilization for poisoning-related visits, 2003–2011. *J Med Toxicol.* 2016;12(3):248–54.

14. Yokell MA, Delgado MK, Zaller ND, Wang NE, McGowan SK, Green TC. Presentation of prescription and nonprescription opioid overdoses to US emergency departments. *JAMA Intern Med.* 2014;174(12):2034–47.
15. Vivolo-Kantor AM, Seth P, Gladden RM, Mattison CL, Baldwin GT, Kite-Powell A, et al. Trends in emergency department visits for suspected opioid overdoses - United States, July 2016 to September 2017. *MMWR Morb Mortal Wkly Rep.* 2018;67(9):279–85.
16. Brady JE, DiMaggio CJ, Keyes KM, Doyle JJ, Richardson LD, Li G. Emergency department utilization and subsequent prescription drug overdose death. *Ann Epidemiol.* 2015;25(8):613-9.
17. Pavarin RM, Berardi D, Gambini D. Emergency department presentation and mortality due to overdose: A retrospective cohort study on nonfatal overdoses. *Subst Abus.* 2016;37(4):558-63.
18. Daly ER, Dufault K, Swenson DJ, Lakevicius P, Metcalf E, Chan BP. Use of emergency department data to monitor and respond to an increase in opioid overdose in New Hampshire, 2011-2015. *Public Health Rep.* 2017;132(S1):S73-S9.
19. Bohnert ASB, Bonar EE, Cunningham R, Greenwald MK, Thomas L, Chermack S, et al. A pilot randomized clinical trial of an intervention to reduce overdose risk behaviors among emergency department patients at risk for prescription opioid overdose. *Drug Alcohol Depend.* 2016;163:40-7.
20. Banta-Green CJ, Coffin PO, Merrill JO, Sears JM, Dunn C, Floyd AS, et al. Impacts of an opioid overdose prevention intervention delivered subsequent to acute care. *Inj Prev.* 2019;25(3):191-8.
21. Ramchand R, Ahluwalia SC, Xenakis L, Apaydin E, Raaen L, Grimm G. A systematic review of peer-supported interventions for health promotion and disease prevention. *Prev Med.* 2017;101:156-70.
22. Eddie D, Hoffman L, Vilsaint CL, Abry A, Bergman BG, Hoeppe B, et al. Lived experience in new models of care for substance use disorder: A systematic review of peer recovery support services and recovery coaching. *Front Psychol.* 2019;10:1052.
23. Waye KM, Goyer J, Dettor D, Mahoney L, Samuels EA, Yedinak JL, et al. Implementing peer recovery services for overdose prevention in Rhode Island: An examination of two outreach-based approaches. *Addict Behav.* 2019;89:85-91.
24. Luthra S. States see peer-recovery coaches as a way to break the addiction epidemic [Web]. San Francisco, California: Kaiser Health News; 2016 [Available from: <https://khn.org/news/states-see-peer-recovery-coaches-as-a-way-to-break-the-addiction-epidemic/>].
25. United States Department of Health and Human Services. 2-year Restricted Use Data Analysis System (2016-2017) [Internet]. Rockville, Maryland: Substance Abuse and Mental Health Services Administration; 2018 [Available from: <https://rdas.samhsa.gov/#/survey/NSDUH-2016-2017-RD02YR>].

- 1  
2  
3 26. Centers for Disease Control and Prevention. Multiple Cause of Death, 1999-2017 [Internet].  
4 Hyattsville, Maryland: National Center for Health Statistics; 2019 [Available from:  
5 <https://wonder.cdc.gov/mcd-icd10.html>.  
6  
7
- 8 27. State of Rhode Island. Reporting Requirements - RI BHOLD [Internet]. Providence, Rhode Island:  
9 Department of Behavioral Healthcare, Developmental Disabilities, and Hospitals; 2019 [Available  
10 from: <http://www.bhddh.ri.gov/sections/reporting.php>.  
11  
12
- 13 28. State of Rhode Island. Prescription Drug Monitoring Program [Internet]. Providence, Rhode Island:  
14 Department of Health; 2019 [Available from:  
15 <http://health.ri.gov/healthcare/medicine/about/prescriptiondrugmonitoringprogram/>.  
16  
17
- 18 29. Adams LL. The role of health information technology in improving quality and safety in RI: Can new  
19 money solve old problems? *R I Med J.* 2009;98(8):267-8.  
20
- 21 30. Rowe C, Vittinghoff E, Santos G-M, Behar E, Turner C, Coffin PO. Performance measures of  
22 diagnostic codes for detecting opioid overdose in the emergency department. *Acad Emerg Med.*  
23 2017;24(4):475-83.  
24
- 25 31. Ellison J, Walley AY, Feldman JA, Bernstein E, Mitchell PM, Koppelman EA, et al. Identifying  
26 patients for overdose prevention with ICD-9 classification in the emergency department,  
27 Massachusetts, 2013-2014. *Public Health Rep.* 2016;131(5):671-5.  
28  
29
- 30 32. McCormick M, Koziol JA, Sanchez K. Development and use of a new opioid overdose surveillance  
31 system, 2016. *R I Med J.* 2017;100(4):37-9.  
32
- 33 33. Samuels EA, Bernstein SL, Marshall BDL, Krieger M, Baird JR, Mello MJ. Peer navigation and take-  
34 home naloxone for opioid overdose emergency department patients: Preliminary patient outcomes. *J*  
35 *Subst Abuse Treat.* 2018;94:29-34.  
36  
37
- 38 34. Moerbeek M, van Breukelen GJ, Berger MP. A comparison between traditional methods and multilevel  
39 regression for the analysis of multicenter intervention studies. *J Clin Epidemiol.* 2003;56(4):341-50.  
40
- 41 35. State of Rhode Island. Rhode Island's Strategic Plan on Addiction and Overdose: Four Strategies to  
42 Alter the Course of an Epidemic. Providence, Rhode Island: Governor's Overdose Prevention and  
43 Intervention Task Force; 2015.  
44  
45
- 46 36. Marshall BDL, Yedinak JL, Goyer J, Green TC, Koziol JA, Alexander-Scott N. Development of a  
47 statewide, publicly accessible drug overdose surveillance and information system. *Am J Public Health.*  
48 2017;107(11):1760-3.  
49
- 50 37. McClellan C, Lambdin BH, Ali MM, Mutter R, Davis CS, Wheeler E, et al. Opioid-overdose laws  
51 association with opioid use and overdose mortality. *Addict Behav.* 2018;86:90-5.  
52  
53  
54  
55  
56  
57  
58  
59

- 1  
2  
3 38. Koester S, Mueller SR, Raville L, Langegger S, Binswanger IA. Why are some people who have  
4 received overdose education and naloxone reticent to call emergency medical services in the event of  
5 overdose? *Int J Drug Policy*. 2017;48:115-24.  
6  
7  
8  
9  
10  
11  
12  
13  
14  
15  
16  
17  
18  
19  
20  
21  
22  
23  
24  
25  
26  
27  
28  
29  
30  
31  
32  
33  
34  
35  
36  
37  
38  
39  
40  
41  
42  
43  
44  
45  
46  
47  
48  
49  
50  
51  
52  
53  
54  
55  
56  
57  
58  
59  
60



**Authors' Contributions:**

WCG led the manuscript preparation. The research was conceived by FLB and BDLM. All authors provided feedback on several drafts of the study protocol and this manuscript. WCG, BDLM, EAS, MGB, DD, KJL, LM, RCM, TN, GAO, SER, JLY, and FLB read and approved of the final manuscript.

**Funding Statement:**

This research is funded by a grant from the Laura and John Arnold Foundation (Principal Investigators: Francesca L. Beaudoin, MD, PhD and Brandon D.L. Marshall, PhD) with support from the Center for Biomedical Research Excellence (COBRE) on Opioids and Overdose at Rhode Island Hospital (funded by the National Institute of General Medical Sciences, Award: P20GM125507; Principal Investigator: Josiah D. Rich, MD). In addition, Mr. Goedel is supported by the Brown University Clinical and Community-Based HIV Research Training Fellowship (funded by the National Institute of Mental Health, Award: R25MH083620; Principal Investigator: Amy S. Nunn, ScD).

**Declarations of Competing Interest:**

The authors declare no competing interests.

**Word Count:** 3,928 words

1  
2  
3 **Figure 1. Intervention arms in a randomized clinical trial of an emergency department-based peer**  
4 **recovery support intervention to increase treatment uptake and reduce recurrent overdose among**  
5 **individuals at high risk for opioid overdose**  
6  
7  
8  
9  
10  
11  
12  
13  
14  
15  
16  
17  
18  
19  
20  
21  
22  
23  
24  
25  
26  
27  
28  
29  
30  
31  
32  
33  
34  
35  
36  
37  
38  
39  
40  
41  
42  
43  
44  
45  
46  
47  
48  
49  
50  
51  
52  
53  
54  
55  
56  
57  
58  
59  
60

For peer review only

| Certified Peer Recovery Specialist |                                                                                                                                                                                                                                                                | Licensed Clinical Social Worker |                                                                                                                                                                                                                     |
|------------------------------------|----------------------------------------------------------------------------------------------------------------------------------------------------------------------------------------------------------------------------------------------------------------|---------------------------------|---------------------------------------------------------------------------------------------------------------------------------------------------------------------------------------------------------------------|
| 1                                  | <u>Enrollment Visit in Emergency Department</u> <ul style="list-style-type: none"> <li>Intervention based on motivational interviewing plus lived experience of peer recovery specialist</li> <li>Navigate barriers to treatment, provide referrals</li> </ul> | 1                               | <u>Brief Intervention in Emergency Department</u> <ul style="list-style-type: none"> <li>Intervention based on motivational interviewing plus other clinical skills</li> <li>Provide referrals as needed</li> </ul> |
| 2                                  | <u>Community-Based Follow-Up Visit (&lt;48 hours)</u> <ul style="list-style-type: none"> <li>Navigate barriers to treatment and recovery</li> <li>Ongoing peer support</li> <li>Ongoing overdose prevention education</li> </ul>                               |                                 |                                                                                                                                                                                                                     |
| 3                                  | <u>Retention in Peer Recovery Support (≥90 days)</u> <ul style="list-style-type: none"> <li>Promote retention in treatment</li> <li>Ongoing peer support</li> <li>Ongoing overdose prevention education</li> </ul>                                             |                                 |                                                                                                                                                                                                                     |

Figure 1



SPIRIT 2013 Checklist: Recommended items to address in a clinical trial protocol and related documents\*

| Section/item                                              | Item No | Page           |
|-----------------------------------------------------------|---------|----------------|
| <b>Administrative information</b>                         |         |                |
| Title                                                     | 1       | Page 1         |
| Trial registration                                        | 2a      | Page 2         |
|                                                           | 2b      | Not Applicable |
| Protocol version                                          | 3       | Not Applicable |
| Funding                                                   | 4       | Page 18        |
| Roles and responsibilities                                | 5a      | Page 1         |
|                                                           | 5b      | Page 1         |
|                                                           | 5c      | Not Applicable |
|                                                           | 5d      | Not Applicable |
| <b>Introduction</b>                                       |         |                |
| Background and rationale                                  | 6a      | Page 3-4       |
|                                                           | 6b      | Page 5         |
| Objectives                                                | 7       | Page 4         |
| Trial design                                              | 8       | Page 4         |
| <b>Methods: Participants, interventions, and outcomes</b> |         |                |
| Study setting                                             | 9       | Page 5         |
| Eligibility criteria                                      | 10      | Page           |
| Interventions                                             | 11a     | Page 5-6       |
|                                                           | 11b     | Not Applicable |
|                                                           | 11c     | Not Applicable |
|                                                           | 11d     | Not Applicable |
| Outcomes                                                  | 12      | Page 7         |

|                         |    |              |
|-------------------------|----|--------------|
| Participant<br>timeline | 13 | Page 5-6, 10 |
| Sample size             | 14 | Page 9       |
| Recruitment             | 15 | Page 9       |

### **Methods: Assignment of interventions (for controlled trials)**

#### Allocation:

|                                        |     |                |
|----------------------------------------|-----|----------------|
| Sequence<br>generation                 | 16a | Page 9         |
| Allocation<br>concealment<br>mechanism | 16b | Page 9         |
| Implementation                         | 16c | Page 9         |
| Blinding<br>(masking)                  | 17a | Page 10        |
|                                        | 17b | Not Applicable |

### **Methods: Data collection, management, and analysis**

|                            |     |                |
|----------------------------|-----|----------------|
| Data collection<br>methods | 18a | Page 10        |
|                            | 18b | Not Applicable |
| Data<br>management         | 19  | Page 10        |
| Statistical<br>methods     | 20a | Page 10        |
|                            | 20b | Page 10        |
|                            | 20c | Not Applicable |

### **Methods: Monitoring**

|                 |     |                |
|-----------------|-----|----------------|
| Data monitoring | 21a | Page 11        |
|                 | 21b | Not Applicable |
| Harms           | 22  | Page 11        |
| Auditing        | 23  | Not Applicable |

### **Ethics and dissemination**

|                             |    |         |
|-----------------------------|----|---------|
| Research ethics<br>approval | 24 | Page 11 |
|-----------------------------|----|---------|

|    |                   |     |                |
|----|-------------------|-----|----------------|
| 1  |                   |     |                |
| 2  | Protocol          | 25  | Page 11        |
| 3  | amendments        |     |                |
| 4  |                   |     |                |
| 5  | Consent or assent | 26a | Page 11        |
| 6  |                   |     |                |
| 7  |                   | 26b | Not Applicable |
| 8  |                   |     |                |
| 9  | Confidentiality   | 27  | Page 11        |
| 10 |                   |     |                |
| 11 | Declaration of    | 28  | Not Applicable |
| 12 | interests         |     |                |
| 13 |                   |     |                |
| 14 | Access to data    | 29  | Page 12        |
| 15 |                   |     |                |
| 16 | Ancillary and     | 30  | Not Applicable |
| 17 | post-trial care   |     |                |
| 18 |                   |     |                |
| 19 | Dissemination     | 31a | Page 12        |
| 20 | policy            |     |                |
| 21 |                   |     |                |
| 22 |                   | 31b | Not Applicable |
| 23 |                   |     |                |
| 24 |                   | 31c | Not Applicable |
| 25 |                   |     |                |
| 26 |                   |     |                |
| 27 | <b>Appendices</b> |     |                |
| 28 |                   |     |                |
| 29 | Informed consent  | 32  | Not Applicable |
| 30 | materials         |     |                |
| 31 |                   |     |                |
| 32 | Biological        | 33  | Not Applicable |
| 33 | specimens         |     |                |

---

\*It is strongly recommended that this checklist be read in conjunction with the SPIRIT 2013 Explanation & Elaboration for important clarification on the items. Amendments to the protocol should be tracked and dated. The SPIRIT checklist is copyrighted by the SPIRIT Group under the Creative Commons "[Attribution-NonCommercial-NoDerivs 3.0 Unported](https://creativecommons.org/licenses/by-nc-nd/3.0/)" license.
